# Immune Inhibitor A Metalloproteases Contribute to Virulence in *Bacillus Endophthalmitis*

Erin T. Livingston<sup>1</sup>, Md Huzzatul Mursalin<sup>1</sup>, Phillip S. Coburn<sup>2</sup>, Roger Astley<sup>2</sup>, Frederick C. Miller<sup>3,4</sup>, Omar Amayem<sup>2</sup>, Didier Lereclus<sup>6</sup>, Michelle C. Callegan<sup>1,2,5,7\*</sup>

<sup>1</sup>Department of Microbiology and Immunology, The University of Oklahoma Health Sciences Center, Oklahoma City, Oklahoma, United States of America

<sup>2</sup>Department of Ophthalmology, The University of Oklahoma Health Sciences Center, Oklahoma City, Oklahoma, United States of America

<sup>3</sup>Department of Cell Biology, The University of Oklahoma Health Sciences Center, Oklahoma City, Oklahoma, United States of America

<sup>4</sup>Department of Family and Preventive Medicine, The University of Oklahoma Health Sciences Center, Oklahoma City, Oklahoma, United States of America

<sup>5</sup>Dean McGee Eye Institute, Oklahoma City, Oklahoma, United States of America

<sup>6</sup>Micalis Institute, INRAE, AgroParisTech, Université Paris-Saclay, 78350 Jouy-en-Josas, France

<sup>7</sup>Oklahoma Center for Neuroscience, The University of Oklahoma Health Sciences Center, Oklahoma City, Oklahoma, United States of America

<sup>a</sup>Current Address: Department of Microbiology and Immunology, The University of Oklahoma Health Sciences Center, 940 Stanton L. Young Blvd., BMSB 1053 Oklahoma City, Oklahoma, 73104, United States of America

\* Corresponding author

E-mail: michelle-callegan@ouhsc.edu (MC)

## 28 Abstract

29 Bacterial endophthalmitis is a devastating infection that can cause blindness following the  
30 introduction of organisms into the posterior segment of the eye. Over half of *Bacillus*  
31 endophthalmitis cases result in significant loss of useful vision. Often, these eyes have to be  
32 enucleated. *Bacillus* produces many virulence factors in the eye that may contribute to retinal  
33 damage and robust inflammation. This study analyzed *Bacillus* immune inhibitor A (InhA)  
34 metalloproteases, which digest extracellular matrix, tight junction proteins, and antimicrobial  
35 proteins. We hypothesized that InhAs contribute to *Bacillus* intraocular virulence and  
36 inflammation. We analyzed phenotypes and infectivity of wild type (WT), InhA1-deficient  
37 ( $\Delta inhA1$ ), InhA2-deficient ( $\Delta inhA2$ ), or InhA1, A2, and A3-deficient ( $\Delta inhA1-3$ ) *Bacillus*  
38 *thuringiensis*. *In vitro* analysis of growth, proteolysis, and cytotoxicity were compared between *B.*  
39 *thuringiensis* strains. WT and InhA mutants were similarly cytotoxic to retinal cells. Mutant  
40  $\Delta inhA1$  and  $\Delta inhA2$  entered log phase growth earlier than WT. Proteolysis of the  $\Delta inhA1-3$  mutant  
41 was decreased, but this strain grew similar to WT *in vitro*. Experimental endophthalmitis was  
42 initiated by intravitreally infecting C57BL/6J mice with 200 CFU of *B. thuringiensis* WT or InhA  
43 mutants. Intraocular *Bacillus* and retinal function loss were quantified. Intraocular  
44 myeloperoxidase concentrations were quantified and histology was analyzed. Eyes infected with  
45  $\Delta inhA1$  or  $\Delta inhA2$  strains contained greater numbers of bacteria than eyes infected with WT  
46 throughout the course of infection. Eyes infected with single mutants had inflammation and retinal  
47 function loss similar to eyes infected with WT strain. Eyes infected with  $\Delta inhA1-3$  cleared the  
48 infection, with less retinal function loss and inflammation compared to eyes infected with the WT  
49 strain. RT-PCR results suggested that single InhA mutant results may be explained by  
50 compensatory expression of the other InhAs in these mutants. These results indicate that together,  
51 the InhA metalloproteases contribute to the severity of infection and inflammation in *Bacillus*  
52 endophthalmitis.

53

## 54 Author summary

55

56 Bacterial endophthalmitis is an infection of the eye, which can follow accidental contamination of  
57 the posterior segment following ocular surgery (postoperative), a penetrating wound (post-  
58 traumatic), or during spread of bacteria into the eye from the bloodstream (endogenous). During

59 bacterial endophthalmitis, virulent pathogens such as *Bacillus* cause ocular damage via the  
60 activities of an array of virulence factors, including proteases. A class of proteases that are  
61 expressed by *Bacillus* during ocular infection are the immune inhibitor A metalloproteases. Here,  
62 we used a mouse model of endophthalmitis to test mutant *Bacillus* that lack single or multiple  
63 InhAs to determine if these metalloproteases contributed to the virulence during the disease. In the  
64 absence of the production of all InhAs, *Bacillus* could not cause severe infection. Our study  
65 provides new insights into the virulence of *Bacillus* in the eye, and the contribution of its InhA  
66 metalloproteases to establishing infection.

67

## 68 Introduction

69 One of the most severe forms of intraocular inflammation and rapid vision loss caused by  
70 bacteria is due to infection with *Bacillus* spp. [1–6]. *Bacillus* endophthalmitis occurs most often  
71 following ocular trauma involving a foreign body contaminated with this bacterium [7–11].  
72 Despite treatment with antibiotics, anti-inflammatory drugs, and surgical intervention, more than  
73 70% of patients with *Bacillus* endophthalmitis have been documented to have significant vision  
74 loss, and about 50% of those patients underwent evisceration or enucleation of the infected eye  
75 [7–11]. Because this feared infection is difficult to treat, there is great importance in identifying  
76 virulence factors of *Bacillus* that contribute to this blinding disease.

77 *Bacillus thuringiensis* belongs to the *Bacillus cereus sensu lato* group, and is known for  
78 causing severe bacterial endophthalmitis [1,12]. *B. thuringiensis* is so genetically similar to *B.*  
79 *cereus* that the species delineation between the two within the *sensu lato* group has been  
80 problematic despite the various approaches and techniques used [13]. Studies comparing the  
81 genomes of both organisms have suggested that they belong to the same species [14]. It has also  
82 been reported that the genetic and phenotypic properties between these bacteria are barely  
83 distinguishable [15]. Both organisms replicate quickly in the eye, are highly motile, and express  
84 similar virulence factors—all of which may contribute to the severity of endophthalmitis [12,16-  
85 19].

86 The majority of extracellular *Bacillus* virulence factors are produced under the control of  
87 a global regulator, PlcR. An absence of a functioning PlcR system delayed the damage typically  
88 seen in *Bacillus* endophthalmitis [16,19-21]. In intraocular infections with mutants lacking a  
89 functional PlcR system, there was still retinal toxicity, function loss, and vascular permeability.  
90 Virulence factors outside of *plcR* regulation that may have contributed to this delayed response  
91 might include cell wall endopeptidases, S-layer, hemolysins, InhA1 metalloprotease, amidases,  
92 pili, and/or flagella components [20-27]. Our previous work showed that individual toxins, such  
93 as hemolysin BL, phosphatidycholine-specific phospholipase C (PC-PLC), or  
94 phosphatidylinositol-specific phospholipase C (PI-PLC), contributed little to the disease [17,18].  
95 Recently, we observed that specific virulence factors are highly expressed in explanted vitreous  
96 and in mouse eyes, including the immune inhibitor metalloproteases InhA1 and InhA2 [28,29]. A  
97 greater expression of InhA2 was detected in explanted vitreous compared to the levels detected in

98 LB and BHI media. For InhA1, the expression in explanted vitreous was similar to InhA1  
99 expression in BHI. A pangenome-wide study of ocular *Bacillus* isolates also reported molecular  
100 signatures of specific virulence factors, including the InhAs, which were strongly associated with  
101 this intraocular infection [30].

102 The InhA proteins are metalloproteases containing zinc-binding and catalytic active site  
103 residues similar to other metalloproteases such as PrtV of *Vibrio cholera*, thermolysin from  
104 *Bacillus thermoproteolyticus*, E-15 from *Serratia*, and elastase from *Pseudomonas aeruginosa*  
105 [31,32]. InhA1 is secreted by *Bacillus* during all phases of growth, and is associated with the  
106 exosporium [33]. The regulation of InhA1 is dependent on Spo0A, the key factor involved in the  
107 initiation of sporulation, and AbrB, which regulates sporulation gene expression [34,35]. InhA1  
108 has been reported to hydrolyze the insect antibacterial proteins cecropin and attacin [36], degrade  
109 extracellular matrix proteins, and cleave fibronectin, laminin, and collagens types I and IV in tissue  
110 [37,38]. InhA1 also cleaves various exported proteins, including the protease NprA (Npr599 in  
111 *Bacillus anthracis*) [39]. Additionally, InhA1 contributes to *B. cereus* spore escape from  
112 macrophages [40,41]. Injection of purified *B. anthracis* InhA1 and nanoparticles conjugated to *B.*  
113 *anthracis* InhA1 into mice resulted in blood-brain barrier permeability, suggesting a potential role  
114 for InhA1 in meningitis [37].

115 More is known about InhA1 than about the other InhAs of *Bacillus*. InhA1 has a 66%  
116 protein identity to InhA2 and a 72% protein identity to InhA3. All three metalloproteases are  
117 secreted and contain a zinc-binding domain. InhA2 is involved in toxicity of *Galleria mellonella*  
118 after oral inoculation of spores, but InhA2 alone is not sufficient for virulence in this model  
119 [42,43]. In contrast to InhA1, InhA2 is regulated by PlcR and is repressed by Spo0A [25,43]. The  
120 transcription of *inhA3* is activated at the onset of sporulation by the quorum sensor NprR [44]. The  
121 specific functions of InhA2 and InhA3 in infection have not yet been described.

122 Due to the InhAs potential role in degrading important host tissue components and  
123 disrupting barriers, and the evidence that InhAs are expressed in an ocular infection-related  
124 environment, we hypothesized that the InhAs are involved in the *Bacillus* endophthalmitis  
125 pathogenesis. We used a well-characterized experimental model of endophthalmitis in mice to  
126 mimic human infection. Our study demonstrated that the absence of all three InhAs (InhA1, InhA2,  
127 and InhA3) together significantly reduced *Bacillus* virulence during ocular infection. Better

128 knowledge of the underlying mechanisms of these virulence factors in the eye could lead to the  
129 identification of possible therapeutic targets that prevent vision loss in endophthalmitis patients.

130

## 131 **Results**

### 132 **Absence of InhA1 in *Bacillus* Alters Growth and Proteolysis**

133 The phenotypes of *B. thuringiensis* 407 (WT) and its isogenic InhA1-deficient mutant  
134 ( $\Delta inhA1$ ) were compared. WT and  $\Delta inhA1$  *in vitro* growth were compared by subculturing  
135 overnight cultures into fresh brain heart infusion (BHI) broth and quantifying every 2 hours. Figure  
136 1A demonstrates that  $\Delta inhA1$  had higher bacterial concentrations at 2, 4, and 6 hours compared to  
137 that of the WT strain, starting as early as 2 hours ( $P = 0.0263, 0.0065, 0.0059$ , respectively). Both  
138 strains reached similar concentrations at stationary phase at 8 hours. However, the overall growth  
139 rates were not different between the two strains ( $P = 0.2500$ , Figure 1B), suggesting that  $\Delta inhA1$   
140 entered exponential phase earlier than WT. In Figure 1C, hemolytic titers of 18 hour WT and  
141  $\Delta inhA1$  supernatants were similar ( $P \geq 0.8678$ ). Figure 1D shows the comparison of supernatant  
142 cytotoxicity of WT and  $\Delta inhA1$  on human retinal pigment epithelial cells (RPEs). The strains had  
143 similar cytotoxicity ( $P = 0.0700$ ). Proteolysis of WT and  $\Delta inhA1$  on skim milk agar plates was also  
144 compared (Figure 1E). Clear lytic zone sizes around colonies were significantly different, with the  
145  $\Delta inhA1$  *B. thuringiensis* exhibiting smaller proteolytic zones ( $P = 0.0006$ ). Together, these results  
146 suggested that an absence of InhA1 affected bacterial growth and proteolytic activity, but not  
147 hemolysis or cytotoxicity.

148

### 149 **Absence of InhA1 Affects Intraocular Bacterial Burden But Not Inflammation in** 150 **Endophthalmitis**

151 The intraocular growth of WT and  $\Delta inhA1$  *B. thuringiensis* was quantified in the eyes of  
152 C57BL/6J mice (Figure 2). Mouse eyes were infected with approximately 200 CFU/eye of either  
153 WT or  $\Delta inhA1$  *B. thuringiensis*. At 6, 8, 10, and 12 hours postinfection, eyes were harvested and  
154 homogenized. Homogenates were plated on BHI agar and colonies were counted to quantify  
155 intraocular concentration (Figure 2A). Myeloperoxidase (MPO) concentrations were also  
156 quantified in these homogenates by ELISA (Figure 2B). Intraocular concentrations of WT and

157  $\Delta inhA1$  *B. thuringiensis* were significantly different at 6, 8, and 12 hours ( $P = 0.0164, 0.0359,$   
158  $0.0332$ , respectively). The *in vitro* growth differences of WT and  $\Delta inhA1$  *B. thuringiensis* were  
159 reflected *in vivo*. MPO concentrations in the eyes infected with each strain were similar ( $P \geq$   
160  $0.0829$ ), suggesting similar levels of inflammation. Overall, these results suggested that despite  
161 better growth of the  $\Delta inhA1$  mutant, infection-related changes in eyes infected with either strain  
162 should be similar.

163

### 164 **Retinal Function is Not Preserved in the Absence of InhA1**

165 To determine if the absence of InhA1 altered retinal damage in endophthalmitis, we  
166 analyzed WT- and  $\Delta inhA1$ -infected mouse eyes using electroretinography (ERG). Figure 3 depicts  
167 retained A- and B-wave function and representative waveforms of infected eyes after 6, 8, 10, and  
168 12 hours postinfection. The amplitude data indicated that retinal function in eyes infected with WT  
169 and  $\Delta inhA1$  *B. thuringiensis* was similar from 6 to 10 hours postinfection ( $P \geq 0.2767$ , Figure 3A  
170 and Figure 3B). The function of retinal photoreceptor cells is represented by the A-wave function.  
171 Eyes infected with WT and  $\Delta inhA1$  *B. thuringiensis* showed similar reductions in A-wave function  
172 until 12 hours postinfection ( $P \geq 0.2767$ , Figure 3A). The B-wave represents the function of rod  
173 bipolar cells, Muller cells, and second order neurons. At all time points, the B-wave function  
174 rapidly decreased in both WT and  $\Delta inhA1$  *B. thuringiensis*-infected eyes ( $P \geq 0.3022$ , Figure 3B).  
175 The A-wave and B-wave retention responses declined to approximately 25% and 40% in eyes  
176 infected with WT or  $\Delta inhA1$  *B. thuringiensis*, respectively, after 12 hours. Figure 3C shows  
177 representative waveforms, which demonstrate the rapid decrease of retinal function in both A- and  
178 B-waves at 12 hours postinfection. These results demonstrated that the retinal function of eyes  
179 infected with WT or  $\Delta inhA1$  *B. thuringiensis* were similar, suggesting that the absence of InhA1  
180 did not alter retinal function loss during experimental endophthalmitis.

181

### 182 **Absence of InhA1 Does Not Preserve Ocular Architecture**

183 The WT and  $\Delta inhA1$  *B. thuringiensis*-infected eyes were harvested and fixed, sectioned,  
184 and stained with hematoxylin and eosin (Figure 4). At all time points, the ocular architecture in  
185 both WT and  $\Delta inhA1$  *B. thuringiensis*-infected eyes were similar. Beginning at 8 hours



186 postinfection, inflammatory cells entered the vitreous. At 10 hours postinfection, a significant  
187 amount of fibrin and inflammatory cells were observed in the vitreous. At 12 hours postinfection,  
188 severe inflammation, retinal detachment, and indistinguishable retinal layers were observed in the  
189 posterior segments of both WT and  $\Delta inhA1$  *B. thuringiensis*-infected eyes. These results showed  
190 that an absence of InhA1 did not reduce the damage observed in *Bacillus* endophthalmitis. This  
191 further suggests that InhA1 alone did not contribute to the pathogenesis of *Bacillus*  
192 endophthalmitis.

193

#### 194 **Absence of InhA2 in *Bacillus* Alters Growth**

195 Because InhA2 was also expressed in BHI, Luria-Bertani (LB) broth, and in *Bacillus*  
196 endophthalmitis-related environments [28-30], we also explored the contribution of this potential  
197 virulence factor. The growth and phenotypes of *B. thuringiensis* 407 (WT) and its isogenic InhA2-  
198 deficient mutant ( $\Delta inhA2$ ) were compared.  $\Delta inhA2$  had higher bacterial concentrations than WT  
199 at 2, 6, and 8 hours ( $P = 0.0311$ ,  $0.0160$ , and  $0.0075$ , respectively) (Figure 5A). Figure 5B  
200 demonstrates that although the InhA2 mutant and WT had similar growth rates, the InhA2 mutant  
201 reached stationary phase 2 hours before the WT *B. thuringiensis*.  $\Delta inhA2$  also entered log phase 2  
202 hours before the WT strain. Figure 5C showed no significant differences in the hemolytic activity  
203 of WT and  $\Delta inhA2$  *B. thuringiensis* supernatants from 18 hour cultures ( $P \geq 0.9623$ ). Cytotoxicity  
204 of human RPE was also similar between WT and  $\Delta inhA2$  *B. thuringiensis* supernatants ( $P =$   
205  $0.7931$ , Figure 5D), as was proteolytic activity ( $P = 0.1359$ , Figure 5E). These results indicated  
206 that absence of InhA2 affected *in vitro* bacterial growth, but not proteolysis, hemolysis, or  
207 cytotoxicity. These results suggested that the intraocular growth of *Bacillus* lacking InhA2 might  
208 infect the mouse eye in a manner similar to that of the InhA1 mutant.

209

#### 210 **Absence of InhA2 Increases Bacterial Burden But Not Inflammation in Endophthalmitis**

211 To determine if InhA2 contributed to intraocular growth and inflammation, the  
212 concentrations of bacteria and MPO were determined after 200 CFU of WT or  $\Delta inhA2$  *B.*  
213 *thuringiensis* were intravitreally injected into the eyes of mice. Figure 6A depicts the intraocular  
214 growth of WT and  $\Delta inhA2$  *B. thuringiensis* at 6, 8, 10, and 12 hours postinfection. The  $\Delta inhA2$  *B.*



215 *thuringiensis*-infected eyes contained significantly more bacteria than WT-infected eyes at 6 and  
216 12 hours postinfection ( $P = 0.0286$  and  $0.0087$ , respectively). Figure 6B shows that the intraocular  
217 MPO concentration was similar between eyes infected with WT or  $\Delta inhA2$  *B. thuringiensis* ( $P \geq$   
218  $0.4480$ ). These results confirmed that an absence of InhA2 reflected the bacterial growth observed  
219 *in vitro* as well as the intraocular growth of the  $\Delta inhA1$  *B. thuringiensis*. These similarities  
220 suggested that the retinal changes in  $\Delta inhA2$  *B. thuringiensis*-infected eyes might be similar to the  
221 retinal changes observed in  $\Delta inhA1$  *B. thuringiensis*-infected eyes (Figure 2).

222

### 223 **Absence of InhA2 Does Not Affect Retinal Function**

224 Retinal function was analyzed in WT and  $\Delta inhA2$  *B. thuringiensis*-infected mouse eyes  
225 (Figure 7). ERG data demonstrated that the A- and B-wave amplitudes of WT and  $\Delta inhA1$  *B.*  
226 *thuringiensis*-infected eyes were similar from 6 to 12 hours postinfection ( $P \geq 0.3660$ , Figures 7A  
227 and 7B). Both the A- and B-wave retention responses rapidly decreased in WT and  $\Delta inhA2$  *B.*  
228 *thuringiensis*-infected eyes. Figure 7C shows the similarities in representative waveforms of eyes  
229 infected with these strains. This observation highlights the rapid decrease of retinal function in  
230 eyes infected with either WT or  $\Delta inhA2$  *B. thuringiensis*. Eyes infected with  $\Delta inhA2$  *B.*  
231 *thuringiensis* had retinal function loss similar to that of  $\Delta inhA1$ -infected and WT-infected eyes,  
232 suggesting that the absence of InhA1 or InhA2 alone did not affect retinal function loss during  
233 *Bacillus* endophthalmitis.

234

### 235 **Ocular Damage and Inflammation are Similar Between WT and $\Delta inhA2$ Strains**

236 To determine if InhA2 contributed to retinal damage, eyes infected with WT or  $\Delta inhA2$  *B.*  
237 *thuringiensis* were harvested for histological analysis at 6, 8, 10, and 12 hours postinfection (Figure  
238 8). At every time point, the ocular architecture in both WT and  $\Delta inhA2$  *B. thuringiensis*-infected  
239 eyes was similar. At 8 hours postinfection, both WT and  $\Delta inhA2$  *B. thuringiensis*-infected eyes  
240 were inflamed. After 12 hours postinfection, there was retinal detachment and deterioration of  
241 retinal layers in the posterior segment of both WT and  $\Delta inhA2$  *B. thuringiensis*-infected eyes.  
242 These results showed that the absence of InhA2 alone, like the absence of InhA1 alone, did not  
243 alter the ocular damage observed in *Bacillus* endophthalmitis.

244

## 245 **Compensation of InhA Expression in the Single InhA Mutants**

246 To understand the *in vitro* and *in vivo* results observed with the single InhA mutants, we  
247 sought to determine if the absence of one InhA affected the expression of other InhAs. Therefore,  
248 we analyzed the expression of *inhA1*, *inhA2*, and *inhA3* in  $\Delta inhA1$  and  $\Delta inhA2$  *B. thuringiensis*.  
249 Additionally, the expression of all three *inhAs* were examined in  $\Delta inhA1-3$  *B. thuringiensis* as a  
250 negative control. Expression in all mutants was compared to that of WT (Figure 9). The expression  
251 of *inhA2* and *inhA3* in the  $\Delta inhA1$  strain was elevated, but not statistically significantly different from that  
252 of WT (Ct values,  $P \geq 0.3342$ ). The expression of *inhA1* in the  $\Delta inhA2$  strain was significantly greater than  
253 WT (Ct values,  $P = 0.0036$ ). The expression of *inhA3* in the  $\Delta inhA2$  strain was elevated, but not statistically  
254 significantly different from that of WT (Ct values,  $P = 0.1881$ ). Overall, these results suggested that an  
255 absence of expression of a single *inhA* caused an elevated, although not always statistically  
256 significant, expression of the other *inhAs*. This potential compensation could explain why  
257 infections with  $\Delta inhA1$  or  $\Delta inhA2$  mutants were not different from WT infections, despite the  
258 differences in growth. To examine the role of InhAs as a whole in this disease, a *Bacillus* mutant  
259 lacking all three InhAs was tested in subsequent experiments.

260

## 261 **Absence of InhA1, InhA2, and InhA3 in *Bacillus* Alters Proteolysis**

262 To determine if all three *Bacillus* InhAs together were involved in the severity of *Bacillus*  
263 endophthalmitis, a strain lacking all three InhAs ( $\Delta InhA1-3$ ) was tested. Phenotypes of the  $\Delta inhA1-$   
264  $3$  strain were compared to that of its WT *Bacillus* parent strain (Figure 10). Unlike the single InhA  
265 mutants, the *in vitro* growth of WT and  $\Delta inhA1-3$  in BHI was similar at every time point ( $P \geq$   
266  $0.3586$ , Figure 10A). Figure 10B demonstrates that both strains had similar growth rates ( $P =$   
267  $0.7220$ ). Figure 10C shows similarities in hemolytic activities of the supernatants of  $\Delta inhA1-3$  and  
268 the WT strain, except at the dilution of 1:32 ( $P = 0.0001$ ). Both strains had similar cytotoxicity  
269 against RPE cells ( $P = 0.8250$ , Figure 10D). The proteolytic zones of  $\Delta inhA1-3$  *B. thuringiensis*  
270 colonies were significantly smaller compared to that of WT colonies ( $P = 0.0018$ , Figure 10E).  
271 These results showed that an absence of all the InhAs did not affect bacterial growth, hemolysis,

272 or cytotoxicity, but reduced proteolysis. Overall, the results suggested that the  $\Delta InhA1-3$  growth  
273 might be similar to WT *in vivo*.

274

### 275 **Absence of InhAs 1, 2, and 3 Alters Intraocular Bacterial Burden and Inflammation**

276 Because preliminary data suggested that infections with the  $\Delta inhA1-3$  would be less severe,  
277 intraocular growth and MPO concentrations were quantified in eyes infected with  $\Delta inhA1-3$  after  
278 12 hours. The intraocular bacterial concentrations of  $\Delta inhA1-3$  *B. thuringiensis* were lower than  
279 that of WT, with significant differences at 12, 14, and 16 hours postinfection ( $P = 0.0002, 0.0022,$   
280  $0.0095$ , respectively, Figure 11A). At 16 hours postinfection, the concentrations  $\Delta inhA1-3$  *B.*  
281 *thuringiensis* were below the limit of detection in the eye. The MPO concentrations of  $\Delta inhA1-3$ -  
282 infected eyes were also significantly lower compared to WT-infected eyes at 6, 10, and 14 hours  
283 postinfection ( $P = 0.0079, 0.0286, 0.0022$ , respectively, Figure 11B). These differences showed  
284 that an absence of all three InhAs resulted in a lower intraocular bacterial concentration that cleared  
285 approximately 16 hours postinfection. These differences suggested that the retinal function in  
286  $\Delta inhA1-3$  *B. thuringiensis*-infected eyes should be preserved, compared with eyes infected with  
287 the WT strain.

288

### 289 **Retained Retinal Function in Eyes Infected with *Bacillus* Lacking all InhAs**

290 Retinal function analysis of mouse eyes infected with either WT or  $\Delta inhA1-3$  *B.*  
291 *thuringiensis* was performed to determine if the absence of the three InhAs affected retinal  
292 function. In Figure 12, ERGs depict retained retinal function in eyes infected with  $\Delta inhA1-3$  *B.*  
293 *thuringiensis*, which was significantly greater than that of WT-infected eyes at 12, 14, and 16 hours  
294 postinfection for A-wave ( $P \leq 0.0358$ ) and B-wave ( $P \leq 0.0015$ ). The photoreceptor function in  
295  $\Delta inhA1-3$  *B. thuringiensis*-infected eyes was approximately 80% whereas WT-infected eyes had a  
296 photoreceptor function that decreased to approximately 40% at 16 hours postinfection (Figure  
297 12A). Retinal function in  $\Delta inhA1-3$  *B. thuringiensis*-infected eyes was retained to approximately  
298 60%, while function in the WT-infected eyes decreased to approximately 30% at 16 hours  
299 postinfection (Figure 12B). Figure 12C shows representative waveforms of WT and  $\Delta inhA1-3$  *B.*  
300 *thuringiensis*-infected eyes at 14 hours postinfection, which had significantly reduced amplitudes

301 in WT-infected eyes and retained amplitudes in  $\Delta inhA1-3$  *B. thuringiensis*-infected eyes. This  
302 observation indicated that in the absence of InhA1, InhA2, and InhA3, retinal function during  
303 *Bacillus* endophthalmitis was preserved.

304

### 305 **Ocular Architecture is Preserved in the Absence of all Inhs**

306 Histology of WT or  $\Delta inhA1-3$  *B. thuringiensis*-infected eyes is illustrated in Figure 13.  
307 Eyes were harvested for histology at 6, 8, 10, and 12 hours postinfection. Mouse eyes exhibited  
308 similar degrees of inflammation until 12 hours postinfection. At 12 hours postinfection, the WT  
309 eyes had retinal detachments and loss of retinal layers. However, the retinas of  $\Delta inhA1-3$  *B.*  
310 *thuringiensis*-infected eyes were attached, and the layers of the retina were distinguishable. The  
311  $\Delta inhA1-3$  *B. thuringiensis*-infected eyes had fibrin and inflammatory cells present in the vitreous  
312 at 12 hours postinfection, but to a lesser degree than that of WT-infected eyes. Together, these  
313 results demonstrated that the absence of all three Inhs (InhA1, InhA2, and InhA3) significantly  
314 reduced *Bacillus* virulence during intraocular infection.

315

### 316 **Discussion**

317 *Bacillus* is capable of producing a rapid and severe intraocular infection, which often  
318 results in loss of vision or the eye itself. During experimental endophthalmitis, *Bacillus* induces  
319 an explosive inflammatory response with vascular permeability and PMN infiltration into the  
320 vitreous beginning at approximately 4 hours postinfection [1,6]. This blood-retinal barrier  
321 permeability and neutrophil infiltration into a normally immune privileged environment is  
322 detrimental to vision. The immune response in the eye is tightly regulated -- the vitreous is  
323 avascular, there is a lack of lymphatic vessels and antigen presenting cells, and immunosuppressive  
324 factors are present [45-47]. Bacterial endophthalmitis and other ocular diseases with inflammation  
325 compromise immune privilege. A combination of toxin activities, the early innate immune  
326 response, and subsequent ocular damage during endophthalmitis allows the components of blood  
327 from the retinal vasculature enter the vitreous [20,21,48–52]. The retinal vascular permeability and  
328 PMN infiltration observed in *Bacillus* endophthalmitis is due, in part, to *Bacillus* virulence factors  
329 and their effect on ocular barrier cells, such as the RPE [20,21]. Identifying virulence factors that

330 contribute to processes that result in compromised ocular clarity are of interest in understanding  
331 how *Bacillus* induces a rapid and severe disease.

332 *Bacillus cereus sensu lato* group species produce many virulence factors that may  
333 contribute to ocular inflammation and damage during *Bacillus* endophthalmitis [12,17-20,23,26].  
334 For *B. cereus* and *B. thuringiensis*, a majority of these virulence factors are controlled by the  
335 pleotropic regulator of extracellular virulence, PlcR. We reported that in the absence of PlcR-  
336 regulated toxin expression, *Bacillus* is capable of inducing inflammatory cell influx, blood retinal  
337 permeability, and retinal function loss in experimental endophthalmitis, albeit slower than that  
338 caused by WT *Bacillus* [19,21]. This suggests that virulence factors not regulated by PlcR  
339 contribute to intraocular infection as well.

340 To identify the specific virulence factors that contribute to *Bacillus* endophthalmitis, recent  
341 studies have observed molecular signatures and virulence factor gene expression in *Bacillus*-  
342 infected mouse eyes. In particular, the InhA metalloproteases of *Bacillus* are highly expressed in  
343 explanted vitreous [28] and are strongly associated with experimental *Bacillus* endophthalmitis  
344 [29,30]. The InhAs have a wide range of functions in many members of the *Bacillus cereus sensu*  
345 *lato* group. Originally identified for hydrolyzing insect antibacterial proteins [36], the InhA1  
346 protein has now been demonstrated to be involved in autocleavage events which may contribute  
347 to *Bacillus*' ability to escape from host macrophages and modulate its own secretome [40,53].  
348 InhA1 has been observed to contribute to blood-brain barrier permeability by degrading ZO-1 [37],  
349 a tight junction protein found in retinal barriers [20,21]. These studies highlight the potential  
350 importance of InhAs in infection, so we sought to determine their contribution to the severity of  
351 *Bacillus* endophthalmitis.

352 To ensure that the absence of InhAs did not affect hemolysis and cytotoxicity, we compared  
353 these activities in supernatants of InhA mutant and WT *B. thuringiensis*. The absence of InhA1  
354 affected proteolysis, but not hemolysis or cytotoxicity. This was not the case for InhA2, since  
355  $\Delta inhA2$  *B. thuringiensis* was as proteolytic as WT. This result may have been attributed to the  
356 elevated expression of InhA1 and InhA3 in the  $\Delta inhA2$  mutant compared to WT. Although InhA2  
357 and InhA3 were expressed in the  $\Delta inhA1$  mutant, the proteolysis of  $\Delta inhA1$  *B. thuringiensis* was  
358 significantly less than WT. InhA1 has been shown to be important for degrading tight junction  
359 proteins, plasma, and matrix proteins [37,38,54]. Thus, InhA1 may be important for retinal

360 vascular permeability and intraocular tissue destruction via degradation of tight junction and  
361 extracellular matrix protein during *Bacillus* endophthalmitis.

362 In this study, we investigated the effects of *Bacillus thuringiensis* InhA mutations on  
363 intraocular growth, inflammation, and retinal function during experimental *Bacillus*  
364 endophthalmitis. Our findings showed that the absence of single InhAs affected the expression of  
365 the other InhAs, and that bacterial growth *in vitro* was affected by the absence of InhA1 or InhA2,  
366 resulting in higher concentrations of bacteria beginning at the exponential phase of growth. A  
367 similar growth phenotype was observed *in vivo* during *Bacillus* endophthalmitis. This growth  
368 phenotype may be a consequence of the expression of other InhAs when one InhA is absent.  
369 Another possible explanation for this difference is that InhAs might affect bacterial physiology.  
370 We inoculated fresh media with stationary phase *Bacillus*, so *Bacillus* must re-enter the  
371 logarithmic state before multiplying. It is possible that the physiological state of the  $\Delta inhA1$  and  
372  $\Delta inhA2$  strains facilitated a faster switch to logarithmic phase after inoculation in fresh medium.  
373 The InhA metalloproteases are a part of the M6 evolutionary protein family, which has been  
374 identified in environmental genera such as *Clostridioides*, *Geobacillus*, *Shewanella*, and *Vibrio*  
375 [55]. This type of protease might contribute to environmental persistence, nutrient acquisition, and  
376 survival. In a study investigating bacterial zinc metalloproteases from *Aeromonas salmonicida*,  
377 protease-deficient *A. salmonicida* strains had slower rates of bacterial growth in media with heat-  
378 inactivated serum [56]. In untreated serum, the growth rates were quickly reduced in these mutants,  
379 suggesting that proteases play a critical role in the early stages of infection process by protecting  
380 bacteria against complement-mediated killing or other serum bactericidal effects. This also  
381 suggested that proteolytic activity might provide nutrients for continued growth and proliferation.  
382 A similar phenomenon may be at play in this study, in which a mutant lacking all three InhAs is  
383 unable to provide nutrients in the vitreous for patterns of growth similar to wild type, leading to  
384 clearance starting at 12 hours postinfection. The  $\Delta inhA1-3$  strain may have grown similar to WT  
385 *in vitro* because of the readily available nutrients in the BHI medium. The growth effects in the  
386 single mutants may be explained by the availability of nutrients via expression of the other InhAs.  
387 *Bacillus* may utilize these InhAs to prolong survival in the ocular environment by degrading  
388 proteins, such as collagen fibers of types II, V, IX and XI in the vitreous. In the absence of the  
389 three InhAs, *Bacillus* may not have been able to degrade these proteins, and the lack of nutrient  
390 availability resulted in a lower burden that was more easily cleared.



391 The inflammatory response in eyes infected with  $\Delta inhA1$  or  $\Delta inhA2$  was similar to that  
392 seen in WT-infected eyes. These observations were unexpected considering the increased  
393 intraocular growth of the single mutants compared to WT. In eyes infected with *Bacillus* lacking  
394 InhAs 1, 2, and 3, the inflammatory response was delayed. These observations may have been due  
395 to the compensating expression of the other InhAs in the single mutants, which may have  
396 facilitated growth to concentrations which triggered the activation of innate immune pathways,  
397 blood-retinal barrier permeability, and PMN infiltration [57,58]. This effect may have been similar  
398 to how *B. anthracis* InhA contributes to breakdown of blood-brain barriers via degradation of ZO-  
399 1, leading to inflammatory cell infiltration and hemorrhaging in the mouse brain [37]. We reported  
400 that *B. cereus*-infected eyes have little to no expression of ZO-1 in the RPE at 12 hours  
401 postinfection [21]. Also, when injected into mouse eyes, WT *B. cereus* and  $\Delta plcR$  *B. cereus*  
402 supernatants induced permeability of the blood ocular barrier [21]. Therefore, secreted InhAs may  
403 contribute to the degrading of ZO-1 and permeability of the blood-retinal barriers, leading to  
404 infiltration of PMNs into the vitreous. PMN are the first and most abundant inflammatory cells  
405 infiltrating into the eye during *B. cereus* endophthalmitis [1,6]. These cells are capable of  
406 phagocytosing *B. cereus in vitro* [57]. InhA1 has been shown to be important for allowing *B.*  
407 *cereus* to escape from macrophages [40]. Whether the InhAs are important in protecting *Bacillus*  
408 from PMN-mediated killing in the eye is an open question.

409 Both bacteria and the inflammatory response contribute to retinal damage. Damage to  
410 retinal cells and tissues may result in substantial and permanent vision loss, which is typical for  
411 *Bacillus* endophthalmitis [9-11]. Because the expression of InhA has been associated with *Bacillus*  
412 ocular infection in mice, and in toxicity in other models, we evaluated retinal function in eyes  
413 infected with WT or  $\Delta inhA1$ ,  $\Delta inhA2$ , or  $\Delta inhA1-3$  *B. thuringiensis*. The absence of all three InhAs  
414 protected the eyes from retinal function loss, which would be expected in eyes with intact retinal  
415 structure and minimal inflammation (Figures 4, 8, and 12). Because WT and  $\Delta inhA1-3$  *B.*  
416 *thuringiensis* had similar cytotoxicity against RPE *in vitro*, the observed differences in retinal  
417 damage *in vivo* may not have been due to differences in the production of other toxins by these  
418 strains. Instead, these differences may correspond with the decreased bacterial growth and delayed  
419 inflammation in eyes infected with the strain lacking the InhA metalloproteases. As previously  
420 mentioned, the InhAs may have a role in growth via nutrient acquisition from the surrounding



421 environment, which could explain the triple mutant's delayed growth *in vivo*, and, subsequently,  
422 its attenuated retinal damage and inflammation.

423         This study is the first to address the importance of the *Bacillus* metalloproteases in an  
424 experimental intraocular eye infection, which mimics human infection. We demonstrated that a  
425 deficiency in *Bacillus* InhAs resulted in an attenuated intraocular infection. Our findings suggest  
426 that the InhAs may facilitate intraocular bacterial growth by producing an environment more  
427 conducive to persistence. Current therapeutics are relatively ineffective in treating *Bacillus*  
428 endophthalmitis [1,9-11,59-63], and due to its rapidly blinding course, *Bacillus* endophthalmitis  
429 requires early and precise treatment [62,63]. Treatment strategies for *Bacillus* and other types of  
430 endophthalmitis should be based on knowledge of the virulence factors that contribute to disease  
431 pathogenesis. Therefore, these metalloproteases may prove to be ideal targets for therapeutics in  
432 this potentially blinding disease.

433

## 434 **Materials and Methods**

### 435 **Ethics Statement**

436         The described experiments were conducted following the guidelines in the *Guide for the*  
437 *Care and Use of Laboratory Animals*, the Association for Research in Vision and Ophthalmology  
438 Statement for the Use of Animals in Ophthalmic and Vision Research, and the University of  
439 Oklahoma Health Sciences Center Institutional Animal Care and Use Committee (approved  
440 protocol 18-043).

441

### 442 **Bacterial Strains**

443         *B. thuringiensis* 407 (WT) or its isogenic InhA mutants ( $\Delta inhA1$ ,  $\Delta inhA2$ ,  $\Delta inhA1-3$ )  
444 [35,64] were injected into mouse eyes, as previously described [2,6,21,23,26,65,65–67].  
445 Phenotypes of WT,  $\Delta inhA1$ ,  $\Delta inhA2$ , and  $\Delta inhA1-3$  *B. thuringiensis* were compared by quantifying  
446 growth, hemolysis, cytotoxicity, and proteolysis, as described below.

447

## 448 **Bacterial Growth Curves**

449 All strains were cultured for 10 hours with aeration at 37°C in brain heart infusion (BHI;  
450 VWR, Radnor, PA, USA) medium. Strains were diluted in fresh BHI to approximately 10<sup>5</sup>  
451 CFU/mL and incubated for an additional 10 hours. Every 2 hours, 20-μL aliquots were track  
452 diluted in PBS and plated onto BHI agar plates, and counted after 24 hours [2,6,21,23,26,65,65–  
453 67]. Growth rates were analyzed by the equation,  $N_t = N_0 \times (1 + r)^t$ , where  $N_t$  is the  
454 concentration of bacteria at the end time,  $N_0$  is the concentration of bacteria at the initial time,  $r$  is  
455 the growth rate, and  $t$  is the time passed.

456

## 457 **Hemolytic Analysis**

458 WT and  $\Delta inhA$  *B. thuringiensis* were each cultured as described above, then centrifuged at  
459 4150 rpm for 10 minutes. Supernatants were removed and filter sterilized (0.22 μm; Millex-GP,  
460 Merck Millipore Ltd., Cork, Ireland) and diluted two-fold in PBS (pH 7.4). Dilutions were  
461 incubated 1:1 with 4% (vol/vol) sheep red blood cells (Rockland Immunochemicals, Pottstown,  
462 PA, USA) in a round-bottom microtiter plate for 30 minutes at 37°C. After centrifugation at 300  
463 x  $g$  for 10 minutes, supernatants were transferred into a flat-bottom microtiter plate and  
464 hemoglobin release was quantified (490 nm, FLUOstar Omega, BMG Labtech, Cary, NC, USA).  
465 Values are expressed in percent hemolysis relative to a 100% lysis control, as previously described  
466 [16,19,26,61,68]. Values represent the means ± SD of two independent experiments.

467

## 468 **Retinal Pigment Epithelial Cell Cytotoxicity**

469 Human ARPE-19 cells (American Type Culture Collection, Manassas, VA, USA) were  
470 grown to confluence in culture medium (DMEM/F12 supplemented with 10% fetal bovine serum  
471 and 1% glutamine; Gibco, Grand Island, NY, USA), diluted, and seeded into sterile 24-well plates.  
472 Twenty-thousand cells/100 μL were seeded in triplicate wells for overnight incubation.  
473 Supernatants of WT and  $\Delta inhA$  *B. thuringiensis* were generated as described above, diluted 1:2,  
474 and added to wells containing ARPE-19. Cytotoxicity was measured by quantifying lactate

475 dehydrogenase (LDH) from ARPE-19 (Pierce LDH Cytotoxicity Assay Kit, ThermoFisher  
476 Scientific, Waltham, MA, USA), according to the manufacturer's instructions [12,20].

477

### 478 **Proteolytic Activity Assay**

479 Protease production of WT and  $\Delta inhA$  *B. thuringiensis* was detected on skim milk agar  
480 plates (CRITERION™, Hardy Diagnostics, Santa Maria, CA, USA). Colonies were transferred to the  
481 skim milk agar plates using a sterile toothpick and were incubated at 37°C for 48 h. Clear zones  
482 with at least 1 mm around single colonies indicated the activity of secreted proteases capable of  
483 hydrolyzing casein. Proteolytic zones were measured in millimeters from the edge of the colony  
484 to the edge of the clear zone.

485

### 486 **Mice and Intraocular Infections**

487 *In vivo* experiments used mice (C57BL/6J, stock No. 000664; Jackson Labs, Bar Harbor,  
488 ME, USA). Mice were housed on a 12-hour light/dark cycle, for at least 2 weeks to equilibrate  
489 their microbiota, and under biosafety level 2 conditions. Mice (8-10 weeks old) were sedated with  
490 a cocktail of ketamine (85 mg/kg body weight; Ketathesia, Henry Schein Animal Health, Dublin,  
491 OH, USA) and xylazine (14 mg/kg body weight; AnaSed; Akorn Inc., Decatur, IL, USA). Deep  
492 anesthesia was confirmed by toe pinch. Infections were initiated by intravitreal injection  
493 containing ~200 CFU WT or  $\Delta inhA$  *B. thuringiensis* in 0.5  $\mu$ L BHI using a sterile glass capillary  
494 needle, as previously described [2,6,21,23,26,65,65–67]. Uninjected fellow eyes served as  
495 controls. As described below, eyes were analyzed by electroretinography (ERG) prior to  
496 euthanasia. After euthanasia (CO<sub>2</sub> inhalation), eyes were harvested and infection courses were  
497 analyzed by quantifying intraocular *Bacillus* and polymorphonuclear leukocyte (PMN) infiltration  
498 (myeloperoxidase [MPO] activity), and histology.

499

### 500 **Quantifying Intraocular Bacterial Growth**

501 Intraocular *Bacillus* were quantified from harvested eyes at 0, 2, 6, 8, 10, 12, 14, and 16  
502 hours postinfection. Harvested eyes were homogenized in 400  $\mu$ L PBS containing sterile glass

503 beads (1 mm; BioSpec Products, Inc., Bartlesville, OK, USA). Eye homogenates were then track  
504 diluted onto BHI agar and counted, as previously described [2,6,21,23,26,65,65–67].

505

## 506 **Electroretinography**

507 ERG was used to quantify retinal function in eyes infected with WT or  $\Delta inhA$  *B.*  
508 *thuringiensis*, as previously described [2,6,21,23,26,65,65–67]. Scotopic ERGs were performed at  
509 6, 8, 10, 12, 14, and 16 hours postinfection using Espion E2 software (Diagnosys LLC, Lowell,  
510 MA, USA). Mice were dark-adapted for at least 6 hours prior to ERG. Mice were anesthetized as  
511 noted above, and pupils were topically dilated (Phenylephrine HCl 2.5%; Akorn, Inc.). Two gold  
512 wire electrodes were placed on each cornea and reference electrodes were place on the forehead  
513 and tail. Eyes were then stimulated by five flashes of white light (1200 cd·s/m<sup>2</sup>). A- and B-wave  
514 amplitudes were recorded for both eyes in the same animal. The percentage of retinal function  
515 retained was calculated using the formula  $100 - \{[1 - (\text{experimental A-wave amplitude}/\text{control A-}$   
516  $\text{wave amplitude})] \times 100\}$  or  $100 - \{[1 - (\text{experimental B-wave amplitude}/\text{control B-wave}$   
517  $\text{amplitude})] \times 100\}$ .

518

## 519 **Histology**

520 For histology, eyes were harvested from euthanized mice at 6, 8, 10, and 12 hours  
521 postinfection, incubated in low-alcoholic fixative for 30 minutes, and transferred to 70% ethanol  
522 for at least 24 hours. Paraffin-embedded eyes were sectioned and stained with hematoxylin and  
523 eosin [2,6,21,23,26,65,65–67].

524

## 525 **Estimation of Inflammatory Cell Influx**

526 PMN infiltration into eyes was estimated by quantifying MPO using a sandwich ELISA  
527 (Hycult Biotech, Plymouth Meeting, PA, USA) as previously described [6,27,65,66]. Eyes were  
528 harvested at 6, 8, 10, and 12 hours postinfection, transferred into PBS-containing proteinase  
529 inhibitor (Roche Diagnostics, Indianapolis, IN, USA), and homogenized using sterile glass beads

530 as described above. Eye homogenates were assayed with the MPO ELISA. The lower limit of  
531 detection for this assay was 2 ng/mL.

532

### 533 **RNA Isolation and Quantitative PCR**

534 Expression of immune inhibitor A metalloprotease (InhA1, InhA2, and InhA3) genes from  
535 WT or  $\Delta inhA$  *B. thuringiensis* was measured by real-time quantitative PCR (rtQPCR). Strains were  
536 grown in BHI. Total RNA was isolated from 18-hour cultures (RNeasy Mini Kit; QIAGEN,  
537 Hilden, Germany), DNA was removed (TURBO DNA-free Kit; Invitrogen, Carlsbad, CA, USA),  
538 and RNA was purified (RNA Clean & Concentrator-5 Kit; Zymo Research, Irvine, CA, USA), all  
539 following kit manufacturer's instructions. RNA purity and concentration was confirmed using a  
540 Nanodrop (ThermoFisher). rtQPCR was performed (Applied BioSystems 7500; ThermoFisher),  
541 using the iTaq Universal SYBR Green One-Step Kit (Bio-Rad, Hercules, CA, USA) and primers  
542 listed in Table 1. Amplifications were performed in triplicate. Relative gene expression was  
543 determined using the  $\Delta$ CT method, using 16S rRNA as a reference housekeeping gene.

544

545 **Table 1. Primers Used in Quantitative PCR**

| Gene         | Sequences (5'→3')                                        |
|--------------|----------------------------------------------------------|
| <i>inhA1</i> | AGA AGA TGG AGC GGT TGG TG<br>AAT CGG CTC ACC TTG ACC AC |
| <i>inhA2</i> | GTG GAG GTA GTT GA CAG GG<br>GCC CAG TTG CCA CCC ATA TT  |
| <i>inhA3</i> | GCG TTA CAA CAT GCA CGT GG<br>CAC CTG GAT GAA CGC CTA CC |
| 16s rRNA     | GGC GCG AAA GCG TGG GGA GC<br>CAG CAC TAA AGG GCG GAA AC |

546

### 547 **Statistics**

548 Mann-Whitney U test was used for statistical comparisons unless otherwise specified  
549 (GraphPad Prism 7 Software, Inc., La Jolla, CA, USA) [26,66,68]. P values of < 0.05 were  
550 considered significant.

551 **Acknowledgements**

552           The authors thank Dr. Feng Li and Mark Dittmar (OUHSC Vision P30 Live Animal  
553 Imaging and Analysis Core, Manali Kamath and Wil Nightengale for assistance with RNA  
554 preparations and myeloperoxidase experiments. Dean A. McGee Eye Institute, Oklahoma City,  
555 OK, USA) for invaluable technical assistance, and Excalibur Pathology (Moore, OK, USA) and  
556 the OUHSC P30 Cellular Imaging Core (Dean A. McGee Eye Institute, Oklahoma City, OK, USA)  
557 for histology expertise. This work was presented in part at the Association for Research in Vision  
558 and Ophthalmology Annual Meeting 2019, Vancouver BC and at the Society for Leukocyte  
559 Biology Annual Meeting 2019, Boston MA.

560           This work was supported by National Institutes of Health grants R01EY028810 and  
561 R01EY024140 (to MCC). Our research was also supported in part by National Institutes of Health  
562 grants R01EY025947 and R21EY028066 (to MCC), National Eye Institute Vision Core Grant  
563 P30EY021725 (to MCC), a Presbyterian Health Foundation Research Support Grant Award (to  
564 MCC and MHM), a Presbyterian Health Foundation Equipment Grant (to Robert E. Anderson,  
565 OUHSC), and an unrestricted grant to the Dean A. McGee Eye Institute from Research to Prevent  
566 Blindness.

567

568 **References**

- 569 1. Livingston ET, Mursalin MH, Callegan MC. A pyrrhic victory: The PMN response to  
570 ocular bacterial infections. *Microorganisms*. 2019 Nov 7;7(11):537.
- 571 2. Mursalin MH, Livingston ET, Callegan MC. The cereus matter of *Bacillus*  
572 endophthalmitis. *Exp Eye Res*. 2020;193:107959.
- 573 3. Callegan MC, Engelbert M, Parke DW, Jett BD, Gilmore MS. Bacterial Endophthalmitis:  
574 Epidemiology, Therapeutics, and Bacterium-Host Interactions. 2002;15(1):111–24.
- 575 4. Parkunan SM, Callegan MC. The Pathogenesis of Bacterial Endophthalmitis. In: Durand  
576 ML, editor. *Endophthalmitis*. Springer International Publishing Switzerland; 2016. p. 17–  
577 47.
- 578 5. Callegan MC, Booth MC, Jett BD, Gilmore MS. Pathogenesis of Gram-Positive Bacterial  
579 Endophthalmitis. *Infect Immun*. 1999;67(7): 3348-56.
- 580 6. Ramadan RT, Ramirez R, Novosad BD, Callegan MC. Acute inflammation and loss of  
581 retinal architecture and function during experimental *Bacillus* endophthalmitis. *Curr Eye*  
582 *Res*. 2006;31(11):955–65.
- 583 7. Bhagat N, Nagori S, Zarbin M. Post-traumatic Infectious Endophthalmitis. *Surv*  
584 *Ophthalmol*. 2011;56(3):214–51.
- 585 8. Nicoare SD, Irimescu I, Celinici T, Cristian C. Outcome and Prognostic Factors for  
586 Traumatic Endophthalmitis over a 5-Year Period. *J Ophthalmol*. 2015;2014:1-7.
- 587 9. David DB, Kirkby GR, Noble BA. *Bacillus cereus* endophthalmitis. *Br J Ophthalmol*.  
588 1994;78:577–80.
- 589 10. Davey RT, Tauber WB. Posttraumatic endophthalmitis: the emerging role of *Bacillus*  
590 *cereus* infection. *Rev Infect Dis*. 9(1):110–23.
- 591 11. Vahey JB, Flynn HW. Results in the management of bacillus endophthalmitis.  
592 *Ophthalmic Surg*. 1991;22(11):681–6.
- 593 12. Callegan MC, Cochran DC, Kane ST, Ramadan RT, Chodosh J, McLean C, et al.  
594 Virulence factor profiles and antimicrobial susceptibilities of ocular *Bacillus* isolates.  
595 *Curr Eye Res*. 2006;31(9):693–702.
- 596 13. Maughan H, Van der Auwera G. *Bacillus* taxonomy in the genomic era finds phenotypes  
597 to be essential though often misleading. *Infect Genet Evol*. 2011;11(5):789–97.
- 598 14. Helgason E, Økstad OA, Caugant DA, Johansen HA, Fouet A, Mock M, et al. *Bacillus*  
599 *anthracis*, *Bacillus cereus*, and *Bacillus thuringiensis* - One species on the basis of genetic  
600 evidence. *Appl Environ Microbiol*. 2000;66(6):2627–30.
- 601 15. Cho SH, Kang SH, Lee YE, Kim SJ, Yoo Y Bin, Bak YS, et al. Distribution of toxin  
602 genes and enterotoxins in *Bacillus thuringiensis* isolated from microbial insecticide  
603 products. *J Microbiol Biotechnol*. 2015;25(12):2043–8.
- 604 16. Callegan MC, Kane ST, Cochran DC, Novosad B, Gilmore MS, Gominet M, et al.  
605 *Bacillus* endophthalmitis: Roles of bacterial toxins and motility during infection. *Investig*  
606 *Ophthalmol Vis Sci*. 2005;46(9):3233–8.



- 607 17. Callegan MC, Cochran DC, Kane ST, Gilmore MS, Gominet M, Lereclus D.  
608 Contribution of membrane-damaging toxins to *Bacillus endophthalmitis* pathogenesis.  
609 *Infect Immun.* 2002;70(10):5381–9.
- 610 18. Callegan MC, Jett BD, Hancock LE, Gilmore MS. Role of hemolysin BL in the  
611 pathogenesis of extraintestinal *Bacillus cereus* infection assessed in an endophthalmitis  
612 model. *Infect Immun.* 1999;67(7):3357–66.
- 613 19. Callegan MC, Kane ST, Cochran DC, Gilmore MS, Gominet M, Lereclus D.  
614 Relationship of plcR-regulated factors to *Bacillus endophthalmitis* virulence. *Infect*  
615 *Immun.* 2003;71(6):3116–24.
- 616 20. Moyer A, Ramadan R, Thurman J, Burroughs A, Callegan M. *Bacillus cereus* induces  
617 permeability of an in vitro blood-retina barrier. *Infect Immun.* 2008;76(4):1358–67.
- 618 21. Moyer A, Ramadan R, Novosad B, Astley R, Callegan M. *Bacillus cereus* Induces  
619 Permeability of the Blood Ocular Barrier During Experimental Endophthalmitis. *Invest*  
620 *Ophthalmol Vis Sci.* 2009;50(8):3783–93.
- 621 22. Mursalin MH, Coburn PS, Livingston E, Miller FC, Astley R, Flores-Mireles AL, et al.  
622 *Bacillus S-Layer-Mediated Innate Interactions During Endophthalmitis.* *Front Immunol.*  
623 2020;11(215):1–16.
- 624 23. Mursalin MH, Coburn PS, Livingston E, Miller FC, Astley R, Fouet A, et al. S-layer  
625 Impacts the Virulence of *Bacillus* in Endophthalmitis. *Investig Ophthalmology Vis Sci.*  
626 2019 Sep 3;60(12):3727.
- 627 24. Clair G, Roussi S, Armengaud J, Duport C. Expanding the known repertoire of virulence  
628 factors produced by *Bacillus cereus* through early secretome profiling in three redox  
629 conditions. *Mol Cell Proteomics.* 2010 Jul;9(7):1486–8.
- 630 25. Gohar M, Faegri K, Perchat S, Ravnum S, Økstad OA, Gominet M, et al. The PlcR  
631 virulence regulon of *Bacillus cereus*. *PLoS One.* 2008;3(7):1–9.
- 632 26. Callegan MC, Parkunan SM, Randall CB, Coburn PS, Miller FC, LaGrow AL, et al. The  
633 role of pili in *Bacillus cereus* intraocular infection. *Exp Eye Res.* 2017;159:69–76.
- 634 27. Parkunan SM, Astley R, Callegan MC. Role of TLR5 and flagella in *Bacillus* intraocular  
635 infection. *PLoS One.* 2014;9(6).
- 636 28. Coburn PS, Miller FC, Enty MA, Land C, LaGrow AL, Mursalin MH, et al. Expression  
637 of *Bacillus cereus* Virulence-Related Genes in an Ocular Infection-Related Environment.  
638 *Microorganisms.* 2020;8(607):1–18.
- 639 29. Coburn PS, Miller FC, Enty MA, Land C, LaGrow AL, Mursalin MH, et al. The *Bacillus*  
640 virulome in endophthalmitis. *BioRxiv* doi: <https://doi.org/10.1101/2020.07.02.184630>
- 641 30. Yuan J, Li Y-Y, Xu Y, Sun B-J, Shao J, Zhang D, et al. Molecular Signatures Related to  
642 the Virulence of *Bacillus cereus* Sensu Lato, a Leading Cause of Devastating  
643 Endophthalmitis. *mSystems.* 2019;4(6):1–12
- 644 31. Lövgren A, Zhang M, Engström A, Dalhammar G, Landén R. Molecular characterization  
645 of immune inhibitor A, a secreted virulence protease from *Bacillus thuringiensis*. *Mol*  
646 *Microbiol.* 1990;4(12):2137–46.

- 647 32. Ogierman MA, Fallarino A, Riess T, Williams SG, Attridge SR, Manning PA.  
648 Characterization of the *Vibrio cholerae* El Tor lipase operon lipAB and a protease gene  
649 downstream of the hly region. *J Bacteriol.* 1997;179(22):7072–80.
- 650 33. Charlton S, Moir A, Baillie L, Moir A. Characterization of the exosporium of *Bacillus*  
651 *cereus*. *J Appl Microbiol.* 1999;87(2):241–5.
- 652 34. Hoch JA. Regulation of the onset of the stationary phase and sporulation in *Bacillus*  
653 *subtilis*. Vol. 35, *Advances in Microbial Physiology*. Academic Press; 1993. p. 111–33.
- 654 35. Grandvalet C, Gominet M, Lereclus D. Identification of genes involved in the activation  
655 of the *Bacillus thuringiensis* inhA metalloprotease gene at the onset of sporulation.  
656 *Microbiology.* 2001;147:1805–13.
- 657 36. Dalhammar G, Steiner H. Characterization of inhibitor A, a protease from *Bacillus*  
658 *thuringiensis* which degrades attacins and cecropins, two classes of antibacterial proteins  
659 in insects. *Eur J Biochem.* 1984;139(2):247–52.
- 660 37. Mukherjee D, Tonry J, Kim KS, Ramarao N, Popova T, Bailey C, et al. *Bacillus anthracis*  
661 protease InhA increases blood-brain barrier permeability and contributes to cerebral  
662 hemorrhages. *PLoS One.* 2011;6(3):1–11.
- 663 38. Chung MC, Popova T, Millis B, Mukherjee D, Zhou W, Liotta L, et al. Secreted neutral  
664 metalloproteases of *Bacillus anthracis* as candidate pathogenic factors. *J Biol Chem.* 2006  
665 Oct 20;281(42):31408–18.
- 666 39. Pflughoeft KJ, Swick MC, Engler DA, Yeo H-J, Koehler TM. Modulation of the *Bacillus*  
667 *anthracis* Secretome by the Immune Inhibitor A1 Protease. *J Bacteriol.* 2014;196:424–35.
- 668 40. Ramarao N, Lereclus D. The InhA1 metalloprotease allows spores of the *B. cereus* group  
669 to escape macrophages. *Cell Microbiol.* 2005;7(9):1357–64.
- 670 41. Haydar A, Tran S-L, Guillemet E, Darrigo C, Perchat S, Lereclus D, et al. InhA1-  
671 Mediated Cleavage of the Metalloprotease NprA Allows *Bacillus cereus* to Escape From  
672 Macrophages. *Front Microbiol.* 2018;9(1063):1–10.
- 673 42. Fedhila S, Nel P, Lereclus D. The InhA2 Metalloprotease of *Bacillus thuringiensis* Strain  
674 407 Is Required for Pathogenicity in Insects Infected via the Oral Route. *J Bacteriol.*  
675 2002;184(12):3296–304.
- 676 43. Fedhila S, Gohar M, Slamti L, Nel P, Lereclus D. The *Bacillus thuringiensis* PlcR-  
677 regulated gene inhA2 is necessary, but not sufficient, for virulence. *J Bacteriol.*  
678 2003;185(9):2820–5.
- 679 44. Dubois T, Faegri K, Perchat S, Lemy C, Buisson C, Nielsen-LeRoux C, et al.  
680 Necrotrophism is a Quorum-sensing-regulated lifestyle in *Bacillus thuringiensis*. *PLoS*  
681 *Pathog.* 2012;8(4):1–10.
- 682 45. Streilein JW. Ocular immune privilege: Therapeutic opportunities from an experiment of  
683 nature. *Nat Rev Immunol.* 2003;3(11):879–89.
- 684 46. Sonoda KH, Sakamoto T, Qiao H, Hisatomi T, Oshima T, Tsutsumi-Miyahara C, et al.  
685 The analysis of systemic tolerance elicited by antigen inoculation into the vitreous cavity:  
686 Vitreous cavity-associated immune deviation. *Immunology.* 2005;116(3):390–9.

- 687 47. Taylor AW, Ng TF. Negative regulators that mediate ocular immune privilege. *J Leukoc*  
688 *Biol.* 2018;10.1002/JLB.3MIR0817-337R.
- 689 48. Coburn PS, Wiskur BJ, Astley RA, Callegan MC. Blood–retinal barrier compromise and  
690 endogenous *Staphylococcus aureus* endophthalmitis. *Investig Ophthalmol Vis Sci.*  
691 2015;56(12):7303–11.
- 692 49. Cousins SW, Guss RB, Howes EL, Rosenbaum JT. Endotoxin-induced uveitis in the rat:  
693 Observations on altered vascular permeability, clinical findings, and histology. *Exp Eye*  
694 *Res.* 1984;39(5):665–76.
- 695 50. Antonetti DA, Barber AJ, Khin S, Lieth E, Tarbell JM, Gardner TW. Vascular  
696 permeability in experimental diabetes is associated with reduced endothelial occludin  
697 content. Vascular endothelial growth factor decreases occludin in retinal endothelial cells.  
698 *Diabetes.* 1998;47(12):1953–9.
- 699 51. Natarajan S. Anti-vascular endothelial growth factor in age-related macular degeneration:  
700 Puzzle or a silent beginning! *Indian J Ophthalmol.* 2013;61(9):475–8.
- 701 52. Kumar A, Kumar A. Role of *Staphylococcus aureus* Virulence Factors in Inducing  
702 Inflammation and Vascular Permeability in a Mouse Model of Bacterial Endophthalmitis.  
703 *PLoS One.* 2015;10(6):1–17.
- 704 53. Kastrup CJ, Boedicker JQ, Pomerantsev AP, Moayeri M, Bian Y, Pompano RR, et al.  
705 Spatial localization of bacteria controls coagulation of human blood by “quorum acting”.  
706 *Nat Chem Biol.* 2008 Dec;4(12):742–50.
- 707 54. Rawlings ND. MEROPS: the peptidase database. *Nucleic Acids Res.*  
708 2006;34(90001):D270–2.
- 709 55. Leung K, Stevenson R. Tn5-Induced Protease-Deficient Strains of *Aeromonas hydrophila*  
710 with Reduced Virulence for Fish. *Infect Immun.* 1988;56(10):2639–44.
- 711 56. Murthy KR, Goel R, Subbannayya Y, Jacob H, Murthy PR, Manda SS, et al. Proteomic  
712 analysis of human vitreous humor. *Clin Proteomics.* 2014;11(1):29.
- 713 57. Parkunan SM, Randall CB, Coburn PS, Astley RA, Staats RL, Callegana MC.  
714 Unexpected roles for toll-like receptor 4 and TRIF in intraocular infection with gram-  
715 positive bacteria. *Infect Immun.* 2015;83(10):3926–36.
- 716 58. Novosad BD, Astley RA, Callegan MC. Role of toll-like receptor (TLR) 2 in  
717 experimental *Bacillus cereus* endophthalmitis. *PLoS One.* 2011;6(12):e28619.
- 718 59. Astley RA, Coburn PS, Parkunan SM, Callegan MC. Modeling Intraocular Bacterial  
719 Infections. *Prog Retin Eye Res.* 2016;54:30–48.
- 720 60. Miller FC, Coburn PS, Huzzatul MM, LaGrow AL, Livingston E, Callegan MC. Targets  
721 of immunomodulation in bacterial endophthalmitis. *Prog Retin Eye Res.*  
722 2019;73:100763.
- 723 61. Coburn PS, Miller FC, LaGrow AL, Land C, Mursalin H, Livingston E, et al. Disarming  
724 pore-forming toxins with biomimetic nanosponges in intraocular infections. *mSphere.*  
725 2019;4(3):e00262-19.
- 726 62. Callegan MC, Guess S, Wheatley NR, Woods DC, Griffin G, Wiskur BJ, et al. Efficacy

- 727 of vitrectomy in improving the outcome of *Bacillus cereus* endophthalmitis. *Retina*. 2011  
728 Sep;31(8):1518–24.
- 729 63. Wiskur BJ, Robinson ML, Farrand AJ, Novosad BD, Callegan MC. Toward improving  
730 therapeutic regimens for bacillus endophthalmitis. *Investig Ophthalmol Vis Sci*.  
731 2008;49(4):1480–7.
- 732 64. Guillemet E, Cadot C, Tran SL, Guinebretière MH, Lereclus D, Ramarao N. The InhA  
733 metalloproteases of *Bacillus cereus* contribute concomitantly to virulence. *J Bacteriol*.  
734 2010;192(1):286–94.
- 735 65. Callegan MC, Gilmore MS, Gregory M, Ramadan RT, Wiskur BJ, Moyer AL, et al.  
736 Bacterial endophthalmitis: therapeutic challenges and host-pathogen interactions. *Prog*  
737 *Retin Eye Res*. 2007;26(2):189–203.
- 738 66. Parkunan SM, Randall CB, Astley RA, Furtado GC, Lira SA, Callegan MC. CXCL1, but  
739 not IL-6, significantly impacts intraocular inflammation during infection. *J Leukoc Biol*.  
740 2016;100(5):1125–34.
- 741 67. Coburn PS, Miller FC, LaGrow AL, Parkunan SM, Randall C, Staats RL, et al. TLR4  
742 modulates inflammatory gene targets in the retina during *Bacillus cereus*  
743 endophthalmitis. *BMC Ophthalmol*. 2018;18(1):96.
- 744 68. LaGrow AL, Coburn PS, Miller FC, Land C, Parkunan SM, Luk BT, et al. A Novel  
745 Biomimetic Nanosponge Protects the Retina from the *Enterococcus faecalis* Cytolysin.  
746 *mSphere*. 2017;2(6):e00335-17.
- 747
- 748

749 Figure 1

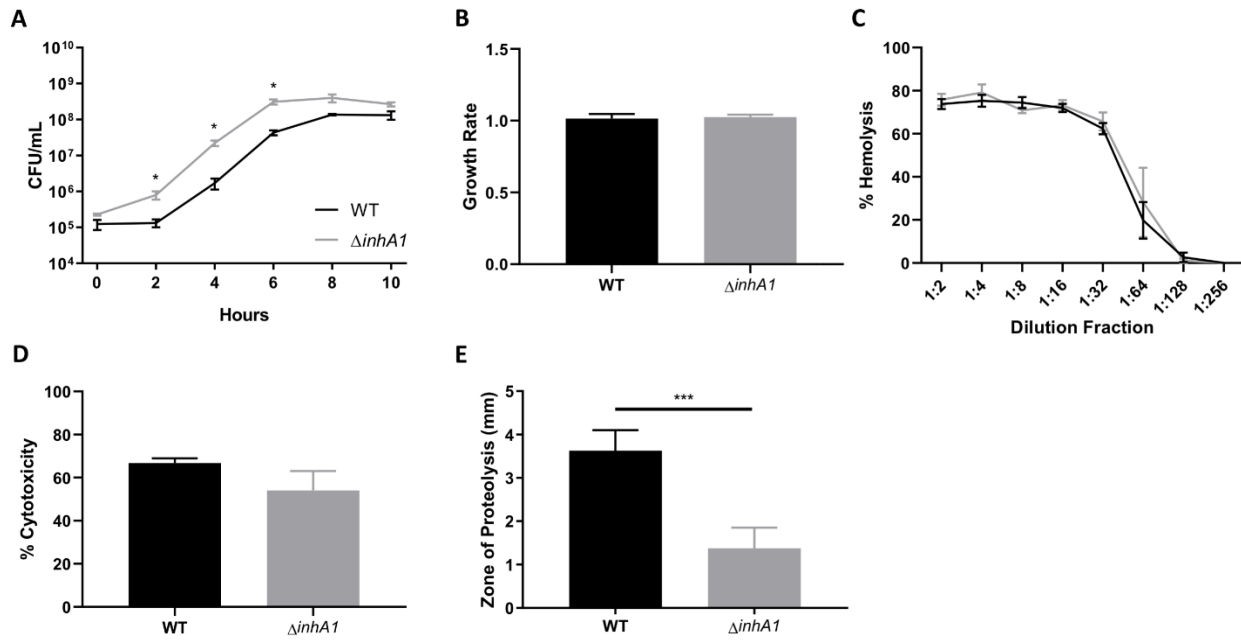

750

751

752

753

754

755

756

757

758

759

760

761

762

763

764 Figure 2

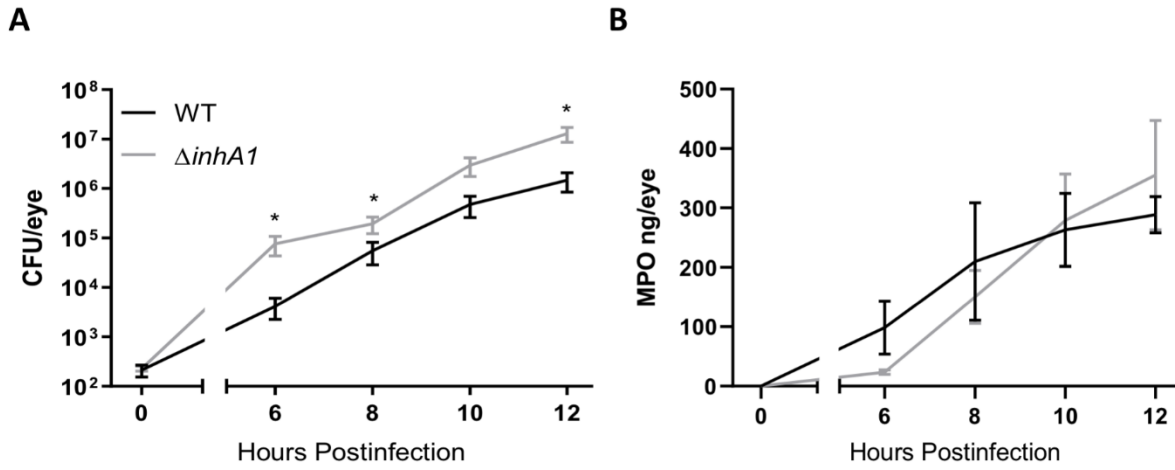

765

766

767

768

769

770

771

772

773

774

775

776

777

778

779

780

781 Figure 3

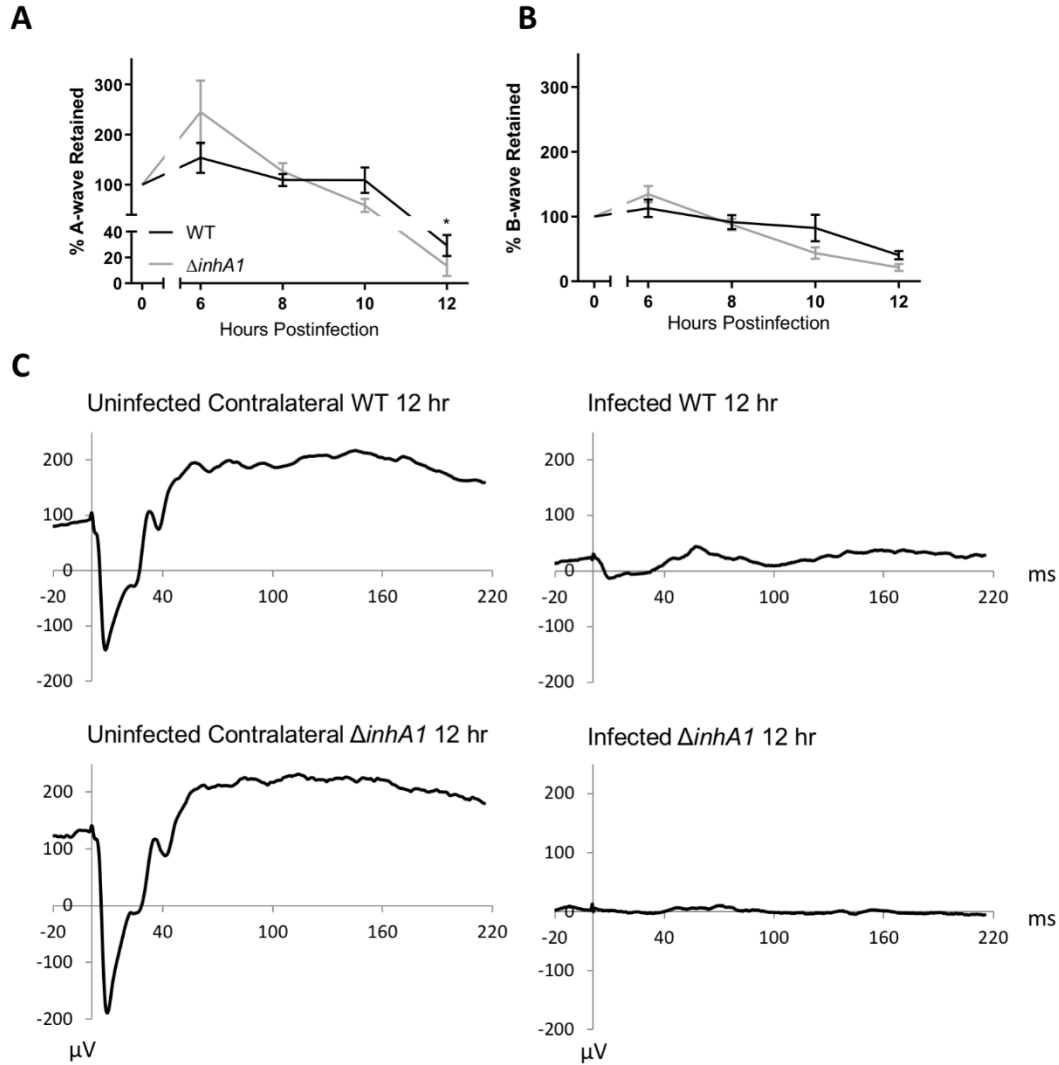

782

783

784

785

786

787

788

789



790 Figure 4

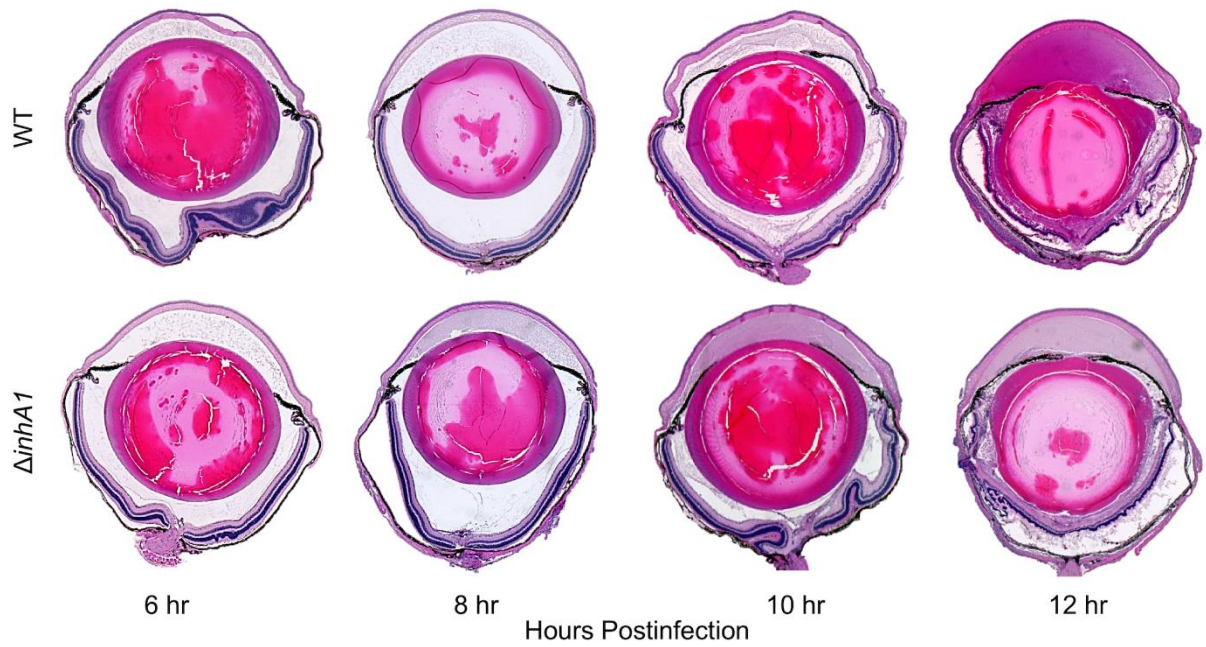

791

792

793

794

795

796

797

798

799

800

801

802

803

804 Figure 5

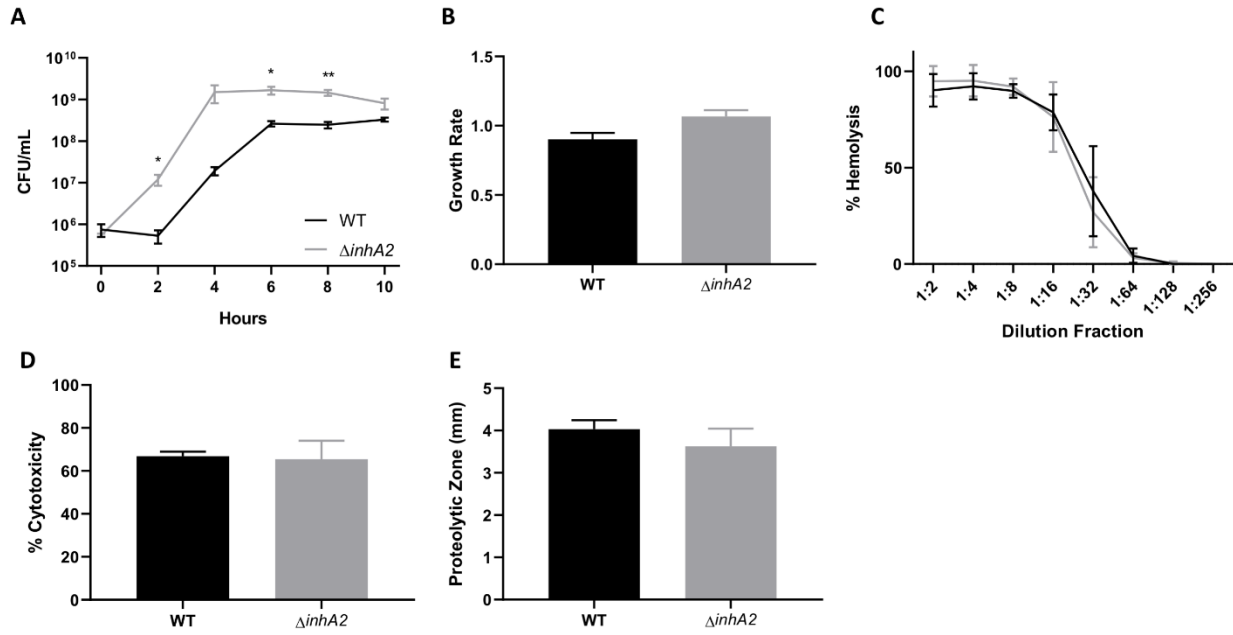

805

806

807

808

809

810

811

812

813

814

815

816

817

818

819 Figure 6

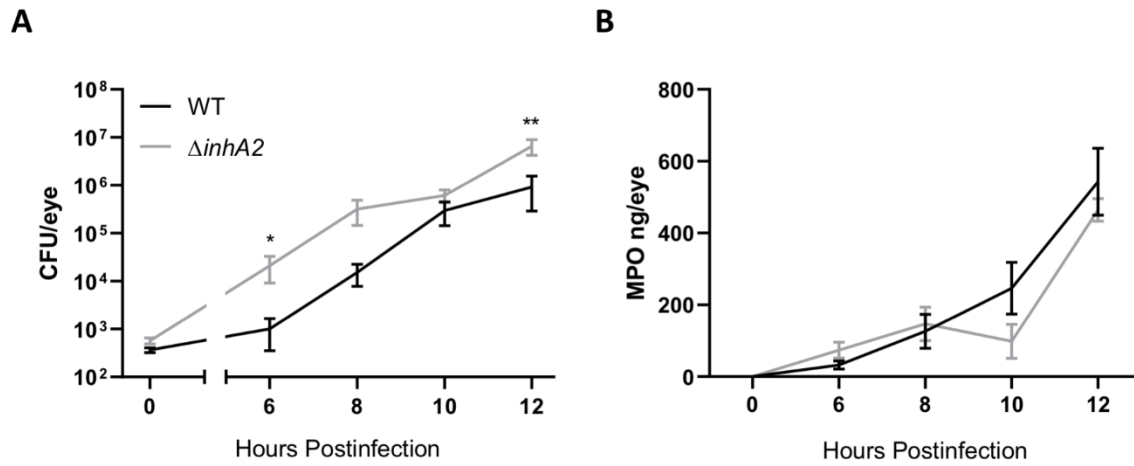

820

821

822

823

824

825

826

827

828

829

830

831

832

833

834

835

836 Figure 7

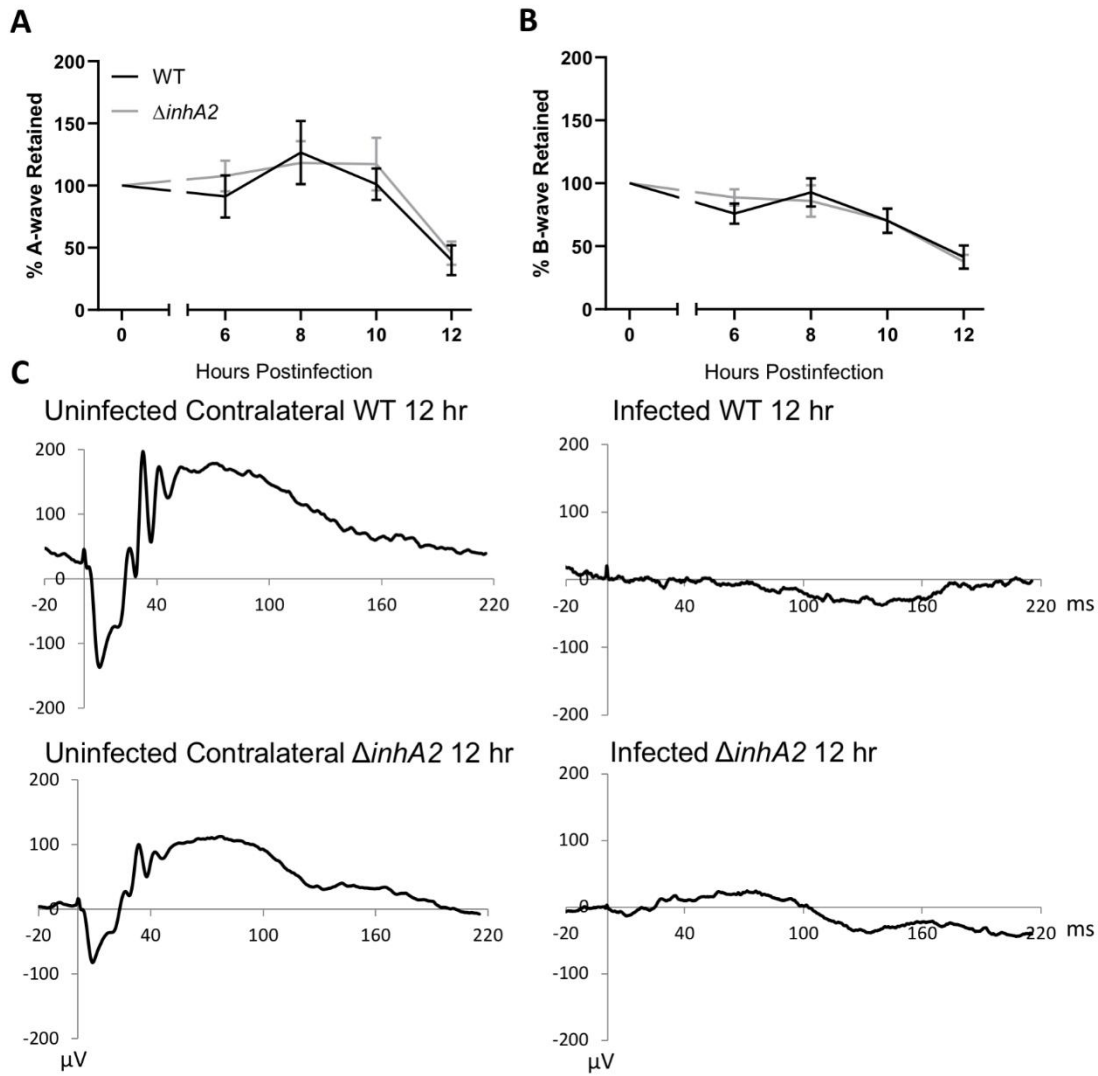

837

838

839

840

841

842

843

844

845 Figure 8

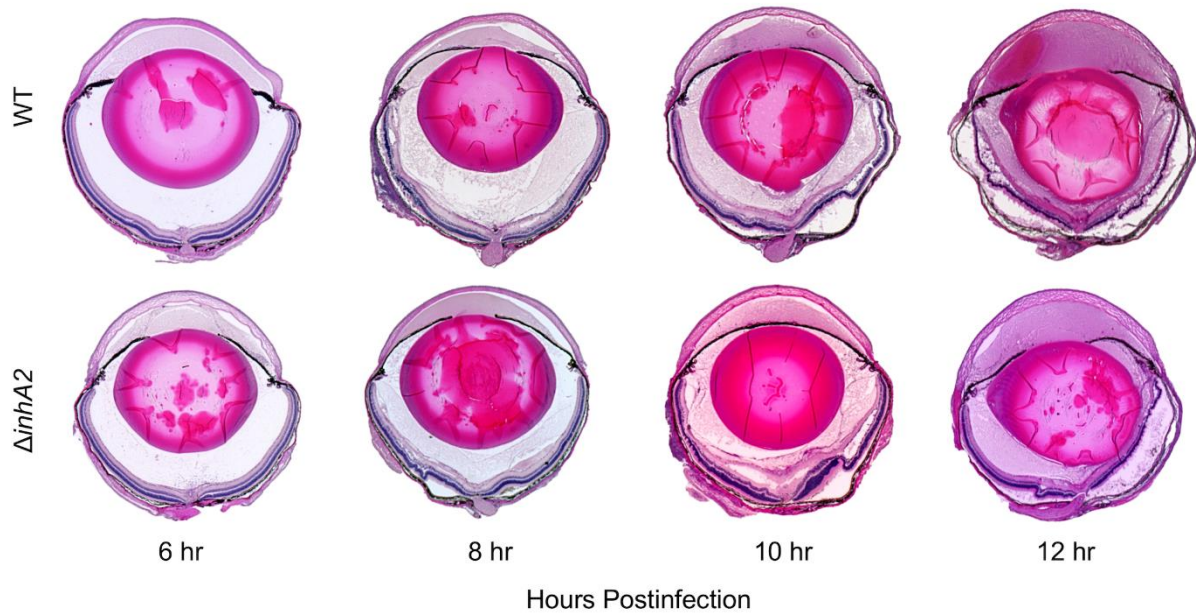

846

847

848

849

850

851

852

853

854

855

856

857

858

859 Figure 9

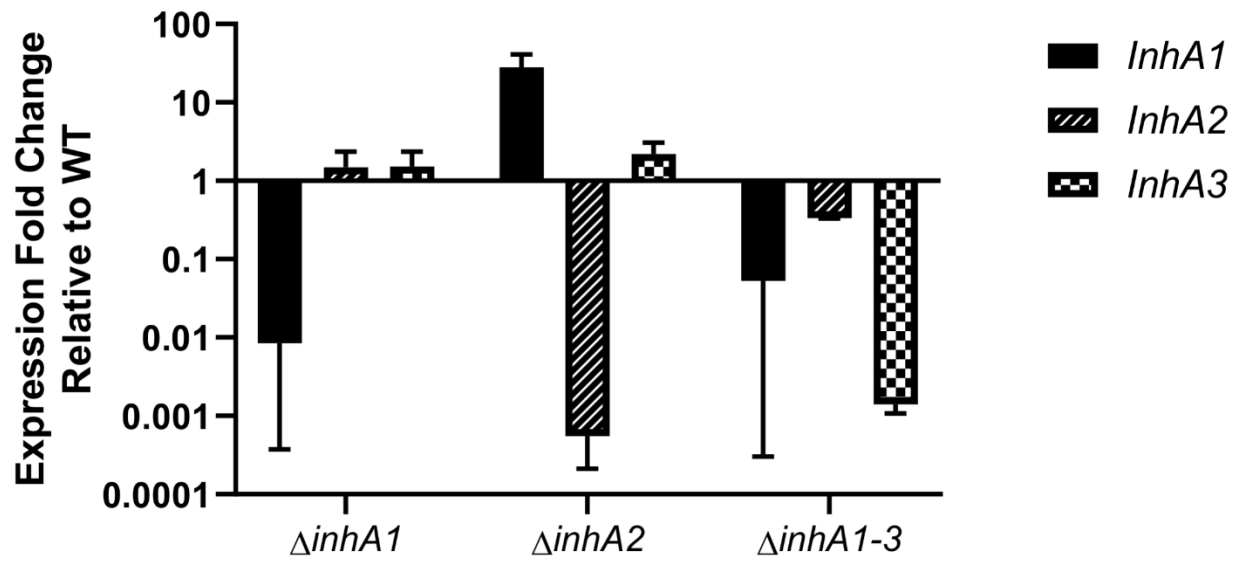

860

861

862

863

864

865

866

867

868

869

870

871

872

873

874

875 Figure 10

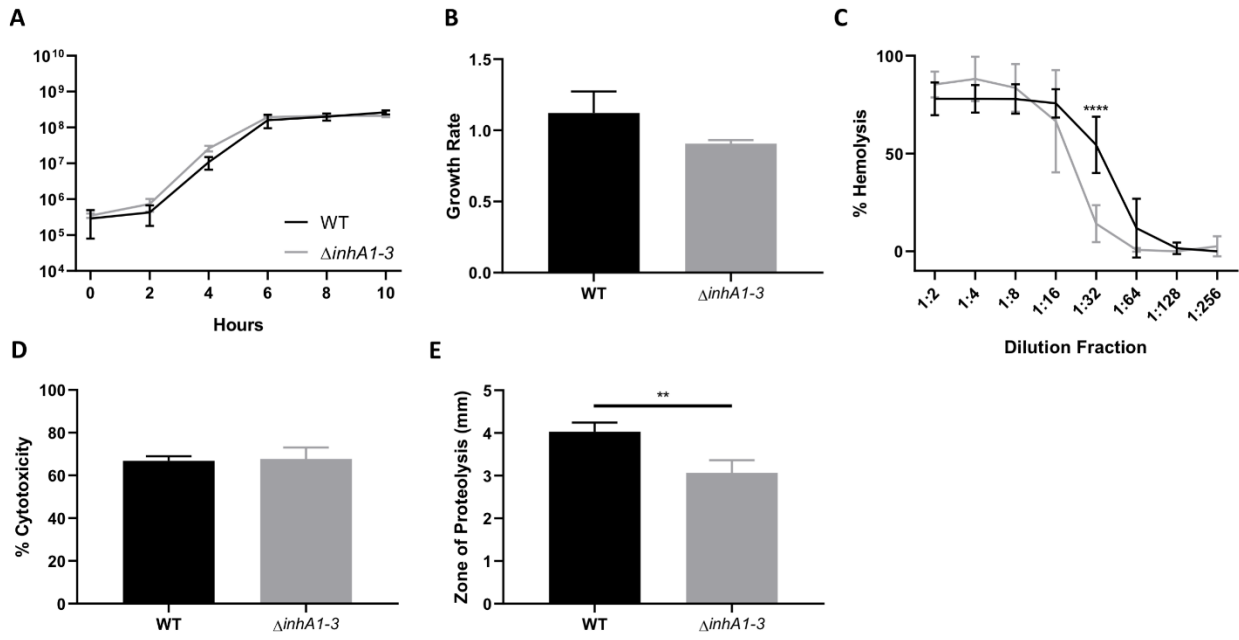

876

877

878

879

880

881

882

883

884

885

886

887

888

889



890 Figure 11

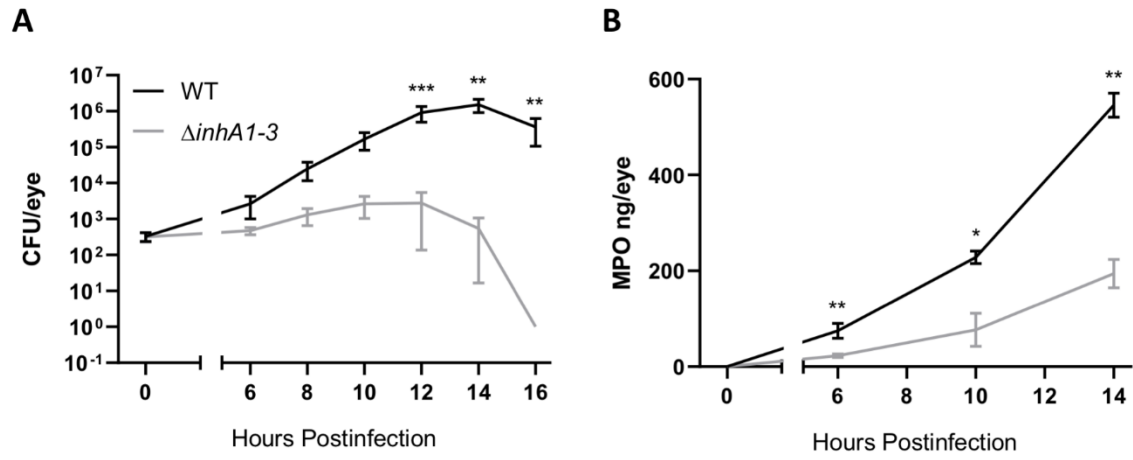

891

892

893

894

895

896

897

898

899

900

901

902

903

904

905

906

907 Figure 12

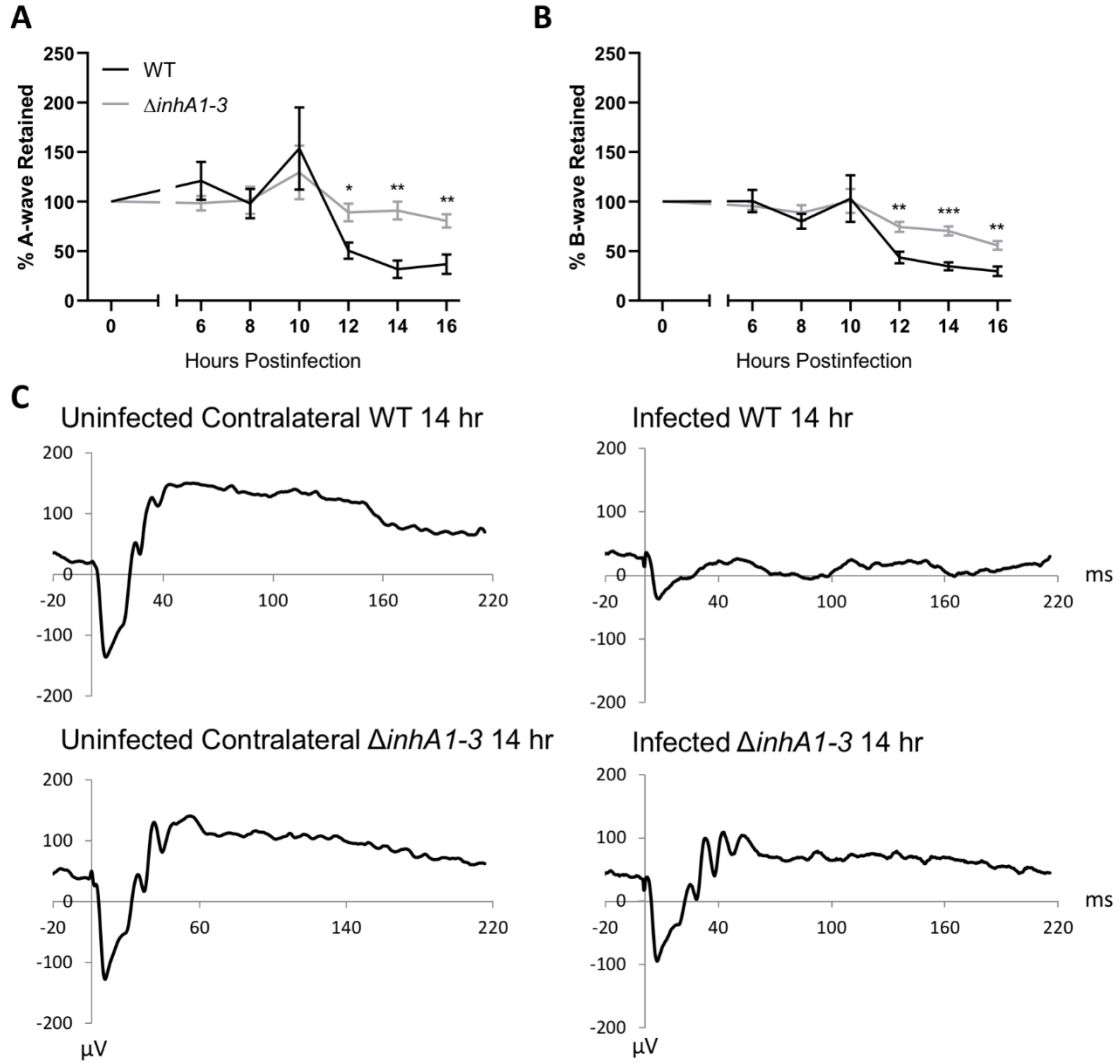

908

909

910

911

912

913

914

915

916 Figure 13

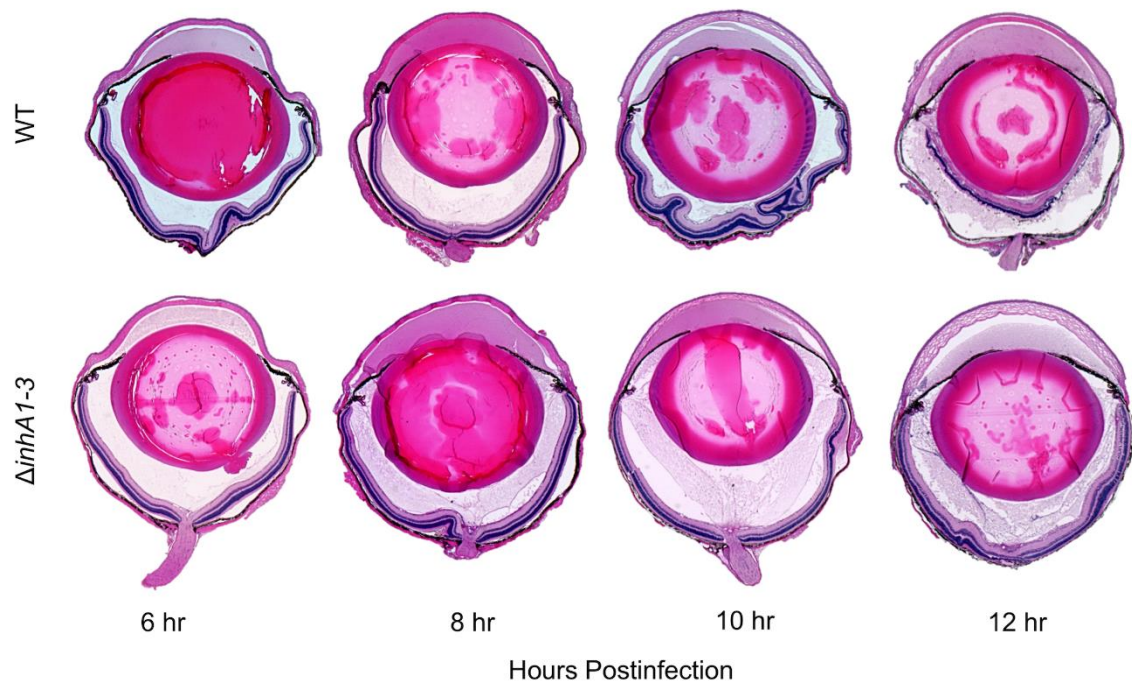

917

918

919

920

921

922

923

924

925

926

927

928

929

930 **Figure Legends**

931

932 **Figure 1. Absence of InhA1 in *Bacillus* alters growth and proteolysis.** (A) *In vitro* growth  
933 curve of WT *B. thuringiensis* and its isogenic InhA1-deficient mutant ( $\Delta inhA1$ ) in BHI broth.  
934 CFU of  $\Delta inhA1$  *B. thuringiensis* were increased compared to WT at 2, 4, and 6 hours ( $P < 0.05$ ).  
935 Values represent the mean  $\pm$  SEM for  $N = 3$  samples per time point. (B) Filter sterilized  
936 supernatants of WT and  $\Delta inhA1$  *B. thuringiensis* were compared for their hemolytic activities at  
937 varying dilutions ( $P > 0.05$ ). (C) Cytotoxicity of filter sterilized overnight supernatants from WT  
938 and  $\Delta inhA1$  *B. thuringiensis* in human retinal pigment epithelial cells. No significant difference  
939 was observed in the cytotoxicity of these strains ( $P = 0.0744$ ). Data represents the mean  $\pm$  SEM  
940 of percent of cytotoxicity for  $N = 3$  samples. (D) Proteolysis of WT and  $\Delta inhA1$  *B. thuringiensis*  
941 was compared by measuring lytic zones around colonies on milk agar. Lytic zones of  $\Delta inhA1$  *B.*  
942 *thuringiensis* were smaller compared to WT ( $P < 0.0005$ ). Values represent the mean  $\pm$  SEM  
943 for  $N = 4$  samples.

944

945 **Figure 2. Absence of InhA1 Affects Intraocular Bacterial Burden But Not Inflammation in**  
946 **Endophthalmitis.** C57BL/6J mouse eyes were injected with 200 CFU WT *B. thuringiensis* or its  
947 isogenic InhA1-deficient mutant ( $\Delta inhA1$ ). (A) At the indicated times postinfection, eyes were  
948 harvested and CFU quantified for bacterial intraocular growth. Data represents the mean  $\pm$  SEM  
949 of  $\log_{10}$  CFU/eye of  $N \geq 4$  eyes per time point for at least two separate experiments. ns:  $P > 0.05$   
950 at 0 and 10 hours postinfection.  $*P < 0.05$  at 6, 8, and 12 hours postinfection. (B) Infected eyes  
951 were harvested and infiltration of PMN was assessed by quantifying MPO in whole eyes by  
952 sandwich ELISA. MPO levels of  $\Delta inhA1$ -infected eyes were similar to WT strains at all time

953 points. Values represent the mean  $\pm$  SEM of MPO (ng/eye) of  $N \geq 4$  per time point for at least  
954 two separate experiments.

955

956 **Figure 3. Retinal Function is Not Preserved in the Absence of *InhA1*.** C57BL/6J mouse eyes  
957 were injected with 200 CFU WT or  $\Delta inhA1$  *B. thuringiensis* and retinal function was assessed by  
958 ERG. (A) Retained A-wave function of WT-infected eyes was similar to eyes infected with  
959  $\Delta inhA2$  *B. thuringiensis* at 6, 8, and 10 hours postinfection ( $P > 0.05$ ). \* $P < 0.05$  at 12 hours  
960 postinfection. (B) B-wave function was also similar in eyes infected with WT and  $\Delta inhA1$  *B.*  
961 *thuringiensis* at 6, 8, 10, and 12 hours postinfection ( $P > 0.05$ ). (C) Representative waveforms  
962 from eyes infected with WT or  $\Delta inhA1$  *B. thuringiensis* at 12 hours postinfection. In these mice,  
963 one eye was infected and the contralateral eye served as the uninfected control. Values represent  
964 the mean  $\pm$  SEM of percentage amplitude retained per time point for at least two separate  
965 experiments. Data are representative of  $N \geq 6$  eyes per time point.

966

967 **Figure 4. Absence of *InhA1* Does Not Preserve Ocular Architecture.** C57BL/6J mouse eyes  
968 were infected with 200 CFU of WT or  $\Delta inhA1$  *B. thuringiensis*. Infected eyes were harvested at  
969 6, 8, 10, and 12 hours postinfection and processed for H&E staining. Magnification,  $\times 10$ .

970

971 **Figure 5. Absence of *InhA2* in *Bacillus* Alters Growth.** (A) *In vitro* growth curve of WT *B.*  
972 *thuringiensis* and its isogenic *InhA2*-deficient mutant ( $\Delta inhA2$ ) in BHI broth. CFU of  $\Delta inhA2$  *B.*  
973 *thuringiensis* were increased compared to WT at 2, 6, and 8 hours ( $P < 0.05$ ). Values represent  
974 the mean  $\pm$  SEM for  $N = 3$  samples per time point. (B) Filter sterilized supernatants of WT and  
975  $\Delta inhA2$  *B. thuringiensis* were compared for their hemolytic activities at varying dilutions ( $P >$

976 0.05). (C) Cytotoxicity of filter sterilized overnight supernatants from WT and  $\Delta inhA2$  *B. thuringiensis* in human retinal pigment epithelial cells. No significant difference was observed in  
977 the cytotoxicity of these strains ( $P > 0.05$ ). Data represents the mean  $\pm$  SEM of percent of  
978 cytotoxicity for  $N = 3$  samples. (D) Proteolysis of WT and  $\Delta inhA2$  *B. thuringiensis* were  
979 compared by measuring lytic zones around colonies on milk agar. Lytic zones of  $\Delta inhA2$  *B.*  
980 *thuringiensis* were similar to WT ( $P > 0.05$ ). Values represent the mean  $\pm$  SEM for  $N = 4$   
981 samples.  
982

983

984 **Figure 6. Absence of InhA2 Increases Bacterial Burden but not Inflammation in**  
985 **Endophthalmitis.** C57BL/6J mouse eyes were injected with 200 CFU WT *B. thuringiensis* or its  
986 isogenic InhA2-deficient mutant ( $\Delta inhA2$ ). (A) At the indicated times postinfection, eyes were  
987 harvested and CFU quantified for bacterial intraocular growth. Data represents the mean  $\pm$  SEM  
988 of  $\log_{10}$  CFU/eye of  $N \geq 4$  eyes per time point for at least two separate experiments. ns:  $P > 0.05$   
989 at 0, 8, and 10 hours postinfection. \* $P < 0.05$  at 6 hours postinfection, and \*\* $P < 0.005$  at 12  
990 hours postinfection. (B) Infected eyes were harvested and infiltration of PMN was assessed by  
991 quantifying MPO in whole eyes by sandwich ELISA. MPO levels of  $\Delta inhA2$ -infected eyes were  
992 similar to WT strains at all time points. Values represent the mean  $\pm$  SEM of MPO (ng/eye)  
993 of  $N \geq 4$  per time point for at least two separate experiments.

994

995 **Figure 7. Absence of InhA2 Does Not Affect Retinal Function.** C57BL/6J mouse eyes were  
996 injected with 200 CFU WT or  $\Delta inhA2$  *B. thuringiensis* and retinal function was assessed by  
997 ERG. (A) Retained A-wave function of WT-infected eyes was similar to eyes infected with  
998  $\Delta inhA2$  *B. thuringiensis* at 6, 8, 10, and 12 hours postinfection ( $P > 0.05$ ). (B) B-wave function

999 was also similar in eyes infected with WT and  $\Delta inhA2$  *B. thuringiensis* at 6, 8, 10, and 12 hours  
1000 postinfection ( $P > 0.05$ ). (C) Representative waveforms from eyes infected with WT or  $\Delta inhA2$   
1001 *B. thuringiensis* at 12 hours postinfection. In these mice, one eye was infected and the  
1002 contralateral eye served as the uninfected control. Values represent the mean  $\pm$  SEM of  
1003 percentage amplitude retained per time point for at least two separate experiments. Data are  
1004 representative of  $N \geq 6$  eyes per time point.

1005

1006 **Figure 8. Ocular Damage and Inflammation are Similar Between WT and  $\Delta inhA2$  Strains**  
1007 **in Endophthalmitis.** C57BL/6J mouse eyes were infected with 200 CFU of WT or  $\Delta inhA2$  *B.*  
1008 *thuringiensis*. Infected eyes were harvested at 6, 8, 10, and 12 hours postinfection and processed  
1009 for H&E staining. Magnification,  $\times 10$ .

1010

1011 **Figure 9. Compensation of InhA Expression in Single InhA Mutants.** Quantitative RT-PCR  
1012 of mutant strains detecting *inhA1*, *inhA2*, and *inhA3* in overnight cultures grown in BHI. 16S  
1013 ribosomal RNA was used as a control. Values represent the mean  $\pm$  SD of expression fold change  
1014 relative to the expression in WT. Data are representative of at least two separate experiments, and  
1015 are representative of  $N=3$ .

1016

1017 **Figure 10. Absence of InhA1, InhA2, and InhA3 in *Bacillus* Alters Proteolysis.** (A) *In vitro*  
1018 growth curve of WT *B. thuringiensis* and its isogenic InhA1-3-deficient mutant ( $\Delta inhA1-3$ ) in  
1019 BHI broth. CFU of  $\Delta inhA1-3$  *B. thuringiensis* was similar to WT at all time points ( $P < 0.05$ ).  
1020 Values represent the mean  $\pm$  SEM for  $N = 3$  samples per time point. (B) Filter sterilized  
1021 supernatants of WT and  $\Delta inhA1-3$  *B. thuringiensis* were compared for their hemolytic activities



1022 at varying dilutions ( $P > 0.05$ ). (C) Cytotoxicity of filter sterilized overnight supernatants from  
1023 WT and  $\Delta inhA1-3$  *B. thuringiensis* in human retinal pigment epithelial cells. A significant  
1024 difference was observed in the cytotoxicity of these strains at the 1:32 dilution fraction  
1025 ( $P > 0.05$ ). Data represents the mean  $\pm$  SEM of percent of cytotoxicity for  $N = 3$  samples. (D)  
1026 Proteolysis of WT and  $\Delta inhA1-3$  *B. thuringiensis* were compared by measuring lytic zones  
1027 around colonies on milk agar. Lytic zones of  $\Delta inhA1-3$  *B. thuringiensis* were significantly less  
1028 compared to WT ( $P > 0.05$ ). Values represent the mean  $\pm$  SEM for  $N = 4$  samples.

1029  
1030 **Figure 11. Absence of InhA1-3 Alters Intraocular Bacterial Burden and Inflammation in**  
1031 **Endophthalmitis.** C57BL/6J mouse eyes were injected with 200 CFU WT *B. thuringiensis* or its  
1032 isogenic InhA1-3-deficient mutant ( $\Delta inhA1-3$ ). (A) At the indicated times postinfection, eyes  
1033 were harvested and CFU quantified for bacterial intraocular growth. Data represents the mean  $\pm$   
1034 SEM of  $\log_{10}$  CFU/eye of  $N \geq 4$  eyes per time point for at least two separate experiments.  $P >$   
1035 0.05 at 12, 14, and 16 hours postinfection. \*\* $P < 0.005$  at 14 and 16 hours postinfection, and  
1036 \*\*\* $P < 0.0005$  at 12 hours postinfection. (B) Infected eyes were harvested and infiltration of  
1037 PMN was assessed by quantifying MPO in whole eyes by sandwich ELISA. MPO levels of  
1038  $\Delta inhA1-3$ -infected eyes were significantly less compared to WT strains at all time points. \* $P <$   
1039 0.05 at 10 hours postinfection, and \*\* $P < 0.005$  at 6 and 14 hours postinfection. Values represent  
1040 the mean  $\pm$  SEM of MPO (ng/eye) of  $N \geq 4$  per time point for at least two separate experiments.

1041  
1042 **Figure 12. Retained Retinal Function in eyes infected with *Bacillus* lacking InhA1-3.**  
1043 C57BL/6J mouse eyes were injected with 200 CFU WT or  $\Delta inhA1-3$  *B. thuringiensis* and retinal  
1044 function was assessed by ERG. (A) Retained A-wave function of WT-infected eyes was

1045 significantly higher to eyes infected with  $\Delta inhA1-3$  *B. thuringiensis* at 12, 14, and 16 hours  
1046 postinfection. **(B)** B-wave function was also higher in eyes infected with  $\Delta inhA2$  *B.*  
1047 *thuringiensis* at 12, 14, and 16 hours postinfection. \*P < 0.05, \*\*P < 0.005, and \*\*\*P < 0.0005.  
1048 **(C)** Representative waveforms from eyes infected with WT or  $\Delta inhA1-3$  *B. thuringiensis* at 12  
1049 hours postinfection. In these mice, one eye was infected and the contralateral eye served as the  
1050 uninfected control. Values represent the mean  $\pm$  SEM of percentage amplitude retained per time  
1051 point for at least two separate experiments. Data are representative of  $N \geq 6$  eyes per time point.

1052

1053 **Figure 13. Ocular architecture is preserved in the absence of InhA1-3.**

1054 C57BL/6J mouse eyes were infected with 200 CFU of WT or  $\Delta inhA1-3$  *B. thuringiensis*.  
1055 Infected eyes were harvested at 6, 8, 10, and 12 hours postinfection and processed for H&E  
1056 staining. Magnification,  $\times 10$ .

1057
